# Supplementary material for: A rapid one-step synthesis of silver and copper coordinated chlorine functionalized fullerene nanoparticles with enhanced antibacterial activity
Source: Royal Society of Chemistry journal article supplement (doi:10.1039/d4na00732h), 2024-01-01
Supplement: d4na00732h1.pdf [file d4na00732h1.pdf]

### Supplemental Data

Zetasizer results:

Size:

|                                               |                   |                    |        |          |          |
|-----------------------------------------------|-------------------|--------------------|--------|----------|----------|
| Sample Name:                                  | Measurement Start |                    |        |          |          |
|                                               | Date And time     |                    |        |          |          |
| C60-Cl                                        | 10/10/2024 11:29  |                    |        |          |          |
| C60-Cl                                        | 10/10/2024 11:30  |                    |        |          |          |
| Name                                          | Mean              | Standard Deviation | RSD    | Minimum  | Maximum  |
| Z-Average (nm)                                | 726.875           | 68.588             | 9.436  | 678.376  | 775.375  |
| Polydispersity Index (PI)                     | 0.464             | 0.2                | 43.209 | 0.322    | 0.605    |
| Peak 1 Mean by Intensity ordered by area (nm) | 526.69            | 73.891             | 14.029 | 474.441  | 578.939  |
| Peak 1 Area by Intensity ordered by area (%)  | 99.157            | 1.191              | 1.202  | 98.315   | 100      |
| Peak 2 Mean by Intensity ordered by area (nm) | 5467.693          | 0                  | 0      | 5467.693 | 5467.693 |
| Peak 2 Area by Intensity ordered by area (%)  | 1.685             | 0                  | 0      | 1.685    | 1.685    |
| Sample Name:                                  | Measurement Start |                    |        |          |          |
|                                               | Date And time     |                    |        |          |          |
| Ag-C60-Cl                                     | 10/10/2024 10:57  |                    |        |          |          |
| Ag-C60-Cl                                     | 10/10/2024 10:58  |                    |        |          |          |
| Ag-C60-Cl                                     | 10/10/2024 10:59  |                    |        |          |          |
| Name                                          | Mean              | Standard Deviation | RSD    | Minimum  | Maximum  |
| Z-Average (nm)                                | 827.305           | 63.316             | 7.653  | 754.197  | 864.344  |
| Polydispersity Index (PI)                     | 0.572             | 0.037              | 6.493  | 0.54     | 0.613    |
| Peak 1 Mean by Intensity ordered by area (nm) | 443.916           | 43.485             | 9.796  | 409.631  | 492.83   |
| Peak 1 Area by Intensity ordered by area (%)  | 100               | 0                  | 0      | 100      | 100      |
| Sample Name:                                  | Measurement Start |                    |        |          |          |
|                                               | Date And time     |                    |        |          |          |
| Cu-C60-Cl                                     | 10/10/2024 11:50  |                    |        |          |          |
| Cu-C60-Cl                                     | 10/10/2024 11:51  |                    |        |          |          |
| Cu-C60-Cl                                     | 10/10/2024 11:52  |                    |        |          |          |
| Name                                          | Mean              | Standard Deviation | RSD    | Minimum  | Maximum  |
| Z-Average (nm)                                | 1044.481          | 56.993             | 5.457  | 984.882  | 1098.45  |
| Polydispersity Index (PI)                     | 0.941             | 0.054              | 5.784  | 0.893    | 1        |
| Peak 1 Mean by Intensity ordered by area (nm) | 436.625           | 41.361             | 9.473  | 410.955  | 484.339  |
| Peak 1 Area by Intensity ordered by area (%)  | 98.307            | 2.932              | 2.983  | 94.921   | 100      |
| Peak 2 Mean by Intensity ordered by area (nm) | 111.778           | 0                  | 0      | 111.778  | 111.778  |
| Peak 2 Area by Intensity ordered by area (%)  | 5.079             | 0                  | 0      | 5.079    | 5.079    |

Zeta results:

| Sample Name:             | Measurement Start |                    |        |         |         |
|--------------------------|-------------------|--------------------|--------|---------|---------|
|                          | Date And time     |                    |        |         |         |
| C60-Cl                   | 10/7/2024 13:18   |                    |        |         |         |
| C60-Cl                   | 10/7/2024 13:20   |                    |        |         |         |
| C60-Cl                   | 10/7/2024 13:22   |                    |        |         |         |
| Name                     | Mean              | Standard Deviation | RSD    | Minimum | Maximum |
| Zeta Potential (mV)      | -58.375           | 0.692              | 1.186  | -59.124 | -57.759 |
| Conductivity (mS/cm)     | 0.005             | 0                  | 0      | 0.005   | 0.005   |
| Wall Zeta Potential (mV) | -81.219           | 2.188              | 2.694  | -83.669 | -79.459 |
| Quality Factor           | 6.968             | 1.285              | 18.449 | 6.195   | 8.452   |
| Zeta Peak 1 Mean (mV)    | -58.413           | 0.642              | 1.1    | -59.124 | -57.874 |
| Zeta Peak 2 Mean (mV)    | -33.899           | 0                  | 0      | -33.899 | -33.899 |

| Sample Name:             | Measurement Start |                    |        |         |         |
|--------------------------|-------------------|--------------------|--------|---------|---------|
|                          | Date And time     |                    |        |         |         |
| Ag-C60-Cl                | 10/7/2024 13:45   |                    |        |         |         |
| Ag-C60-Cl                | 10/7/2024 13:46   |                    |        |         |         |
| Ag-C60-Cl                | 10/7/2024 13:48   |                    |        |         |         |
| Name                     | Mean              | Standard Deviation | RSD    | Minimum | Maximum |
| Zeta Potential (mV)      | -47.48            | 2.746              | 5.784  | -49.317 | -44.323 |
| Conductivity (mS/cm)     | 0.008             | 0                  | 0      | 0.008   | 0.008   |
| Wall Zeta Potential (mV) | -59.093           | 4.8                | 8.123  | -64.455 | -55.197 |
| Quality Factor           | 3.593             | 0.778              | 21.648 | 3.081   | 4.488   |
| Zeta Peak 1 Mean (mV)    | -47.48            | 2.746              | 5.784  | -49.317 | -44.323 |

| Sample Name:             | Measurement Start |                    |        |         |         |
|--------------------------|-------------------|--------------------|--------|---------|---------|
|                          | Date And time     |                    |        |         |         |
| Cu-C60-Cl                | 10/7/2024 13:27   |                    |        |         |         |
| Cu-C60-Cl                | 10/7/2024 13:29   |                    |        |         |         |
| Cu-C60-Cl                | 10/7/2024 13:31   |                    |        |         |         |
| Name                     | Mean              | Standard Deviation | RSD    | Minimum | Maximum |
| Zeta Potential (mV)      | 25.402            | 1.292              | 5.086  | 24.565  | 26.89   |
| Conductivity (mS/cm)     | 0.543             | 0                  | 0      | 0.543   | 0.543   |
| Wall Zeta Potential (mV) | -8.674            | 1.361              | 15.687 | -10.111 | -7.405  |
| Quality Factor           | 2.655             | 1.025              | 38.593 | 1.727   | 3.754   |
| Zeta Peak 1 Mean (mV)    | 25.402            | 1.292              | 5.086  | 24.565  | 26.89   |



Catalase:

| Catalase |             |             |             |             |             |
|----------|-------------|-------------|-------------|-------------|-------------|
|          | C60         |             | Ag-C60      |             | Cu-C60      |
| E. coli  | 61346.66667 |             | 65642.33333 |             | 33313.33333 |
|          | 62826.10872 |             | 65876.36063 |             | 38249.0187  |
|          | 59867.22462 |             | 65408.30603 |             | 28377.64796 |
|          |             | 0.007665811 |             | 0.000706983 | 0.000345672 |
| MRSA     | 54826.33333 |             | 36768       |             | 4663        |
|          | 56599.00827 |             | 39062.24759 |             | 6166.38363  |
|          | 53053.65839 |             | 34473.75241 |             | 3159.61637  |
|          |             | 0.000418692 |             | 3.05837E-06 | 3.49521E-05 |
|          |             |             |             | 0.0000031   | 0.000035    |
|          |             |             |             | 0.0000031   | 0.000035    |

Relaxed Geometry

**A. Ag-Outside:**

# opt freq=raman b3lyp/lanl2dz empiricaldispersion=gd3 geom=connectivity

```

0 1
C      17.09033578 -7.66498386  0.90224560
C      17.01369118 -8.03232037 -0.38237416
C      17.61599377 -9.10484088 -0.94989990
C      18.03389357 -8.34884669  1.59288502
C      16.74582179 -6.33870417  1.19699137
C      16.84811578 -6.94149099 -1.05260151
C      17.85161364 -9.20237274 -2.32821532
C      18.51462442 -9.68571610 -0.14616987
C      18.83370489 -7.73296661  2.39768258
C      18.69949924 -9.43054963  1.17137569
C      17.65202312 -5.64089666  2.10884270
C      16.83078713 -5.95497460 -0.14841559
C      17.27372836 -6.84986033 -2.33538463
C      19.18326692 -9.59394726 -2.13313644

```

|   |             |              |             |
|---|-------------|--------------|-------------|
| C | 17.66400822 | -7.96639416  | -3.08761773 |
| C | 19.51437508 | -9.99772678  | -0.90093667 |
| C | 18.74369119 | -6.39184000  | 2.56588661  |
| C | 19.95334798 | -8.46503833  | 2.43300472  |
| C | 19.89080162 | -9.73545136  | 1.84411178  |
| C | 18.48412019 | -4.68183391  | 1.51524218  |
| C | 17.50306188 | -4.85178420  | -0.55574760 |
| C | 17.90982989 | -5.70125078  | -2.59428101 |
| C | 20.21880293 | -9.03263930  | -2.80218406 |
| C | 18.84099748 | -7.33897630  | -3.51862067 |
| C | 20.76612090 | -10.07554590 | -0.38887116 |
| C | 19.93524013 | -5.78261790  | 2.55738158  |
| C | 21.07888582 | -7.71111869  | 2.43404801  |
| C | 21.02354176 | -10.08898092 | 0.98891190  |
| C | 19.76965542 | -4.69179555  | 1.88714408  |
| C | 18.30287663 | -4.23590538  | 0.24904673  |
| C | 17.96845990 | -4.61436191  | -1.78774152 |
| C | 18.90957868 | -6.01323987  | -3.34904926 |
| C | 20.05322894 | -7.94178118  | -3.47241547 |
| C | 21.50434804 | -9.04261513  | -2.43026204 |
| C | 21.68556242 | -9.48855870  | -1.16405037 |
| C | 21.14750567 | -6.38543504  | 2.60359741  |
| C | 22.07861204 | -8.02314069  | 1.67922557  |
| C | 22.01996026 | -9.11003067  | 0.87275152  |
| C | 20.80519477 | -4.13048700  | 1.21808301  |
| C | 19.22228133 | -3.64886662  | -0.52611154 |
| C | 18.96485284 | -3.63535662  | -1.90385046 |
| C | 20.03506465 | -5.25929552  | -3.34803066 |
| C | 21.24478932 | -7.33255120  | -3.48095574 |
| C | 22.33650885 | -8.08358302  | -3.02392423 |
| C | 22.48538500 | -8.87266574  | -0.35927449 |
| C | 22.32450923 | -5.75806164  | 2.17250703  |
| C | 22.71475418 | -6.87458854  | 1.42028304  |
| C | 22.13687915 | -4.52211125  | 1.41308003  |
| C | 20.47406109 | -3.72670575  | -0.01407442 |
| C | 20.09759768 | -3.98885746  | -2.75907234 |
| C | 21.15474714 | -5.99140675  | -3.31274190 |
| C | 23.24275945 | -7.38579090  | -2.11211561 |
| C | 23.15775663 | -7.76949488  | -0.76666562 |
| C | 23.14038500 | -6.78296708  | 0.13749032  |
| C | 22.37244827 | -4.61966984  | 0.03477025  |
| C | 21.47380177 | -4.03873320  | -0.76889930 |
| C | 21.28890079 | -4.29383417  | -2.08640416 |

|    |             |              |             |
|----|-------------|--------------|-------------|
| C  | 21.95457564 | -5.37554931  | -2.50798437 |
| C  | 22.89819707 | -6.05945312  | -1.81736337 |
| C  | 22.97480852 | -5.69213758  | -0.53275604 |
| Ag | 20.71035537 | -11.57972679 | 2.44120451  |
| Ag | 15.67061070 | -5.51287024  | 2.80678979  |
| Ag | 19.27814682 | -2.14443975  | -3.35593740 |
| Ag | 24.31791303 | -8.21181419  | -3.72190204 |
| Ag | 16.53535667 | -9.52591647  | -3.93830830 |
| Ag | 23.45350634 | -4.19861183  | 3.02286396  |

### A. Ag-Inside:

#p opt freq=raman b3lyp/lanl2dz empiricaldispersion=gd3 geom=connectivity

|     |             |             |             |
|-----|-------------|-------------|-------------|
| 0 1 |             |             |             |
| C   | 1.98390100  | 2.88612600  | 1.26399500  |
| C   | 0.67075400  | 3.55747900  | 0.79972900  |
| C   | -0.59481300 | 3.32331700  | 1.55476700  |
| C   | 1.98809300  | 2.02369200  | 2.46735500  |
| C   | 2.74964300  | 2.49450900  | 0.04365500  |
| C   | 0.66929600  | 3.58486400  | -0.66836500 |
| C   | -1.86164000 | 3.08577800  | 0.78427000  |
| C   | -0.62475100 | 2.43662800  | 2.79002600  |
| C   | 2.72308400  | 0.68872300  | 2.41169300  |
| C   | 0.66424100  | 1.77683900  | 3.28606800  |
| C   | 3.52353900  | 1.24435400  | 0.01964800  |
| C   | 1.98158800  | 2.93111100  | -1.15986300 |
| C   | -0.59775500 | 3.37889900  | -1.42915000 |
| C   | -2.69616400 | 2.06124400  | 1.54592200  |
| C   | -1.86317400 | 3.11278800  | -0.66541600 |
| C   | -1.89812900 | 1.62126300  | 2.73105100  |
| C   | 3.50928800  | 0.33791000  | 1.22650700  |
| C   | 1.91284400  | -0.33375600 | 3.14555100  |
| C   | 0.64573900  | 0.31251300  | 3.63488200  |
| C   | 3.50689500  | 0.38341500  | -1.21997000 |
| C   | 1.98329800  | 2.11392400  | -2.39430300 |
| C   | -0.63020200 | 2.53870800  | -2.69643700 |
| C   | -3.56929900 | 1.10489600  | 0.80074800  |
| C   | -2.69930700 | 2.11739000  | -1.46292500 |
| C   | -1.90657800 | 0.21642200  | 3.15959400  |
| C   | 3.57108200  | -1.13383700 | 0.75207800  |
| C   | 1.90352500  | -1.72167600 | 2.66513200  |

|    |             |             |             |
|----|-------------|-------------|-------------|
| C  | -0.63851600 | -0.44752700 | 3.62203600  |
| C  | 3.56947300  | -1.10497200 | -0.80062600 |
| C  | 2.71832800  | 0.77785400  | -2.38975300 |
| C  | 0.65786100  | 1.89760100  | -3.21901500 |
| C  | -1.90354700 | 1.72164600  | -2.66514400 |
| C  | -3.57117000 | 1.13385800  | -0.75192200 |
| C  | -3.50678100 | -0.38351400 | 1.22005900  |
| C  | -2.71828100 | -0.77801700 | 2.38985000  |
| C  | 2.69925000  | -2.11738000 | 1.46297900  |
| C  | 0.63019500  | -2.53872000 | 2.69630400  |
| C  | -0.65773600 | -1.89785100 | 3.21907200  |
| C  | 2.69627600  | -2.06138700 | -1.54588500 |
| C  | 1.90662500  | -0.21656100 | -3.15950100 |
| C  | 0.63858100  | 0.44738700  | -3.62195000 |
| C  | -1.91283400 | 0.33369600  | -3.14551200 |
| C  | -3.50934400 | -0.33795300 | -1.22642200 |
| C  | -3.52352600 | -1.24445200 | -0.01954900 |
| C  | -1.98322800 | -2.11418700 | 2.39441800  |
| C  | 1.86316600  | -3.11285900 | 0.66544600  |
| C  | 0.59775100  | -3.37890700 | 1.42911600  |
| C  | 1.86169900  | -3.08592900 | -0.78421500 |
| C  | 1.89823500  | -1.62143100 | -2.73104100 |
| C  | -0.64573700 | -0.31259300 | -3.63482900 |
| C  | -2.72309900 | -0.68876700 | -2.41160900 |
| C  | -2.74961600 | -2.49462500 | -0.04360000 |
| C  | -1.98149400 | -2.93127400 | 1.15989900  |
| C  | -0.66923800 | -3.58496000 | 0.66838700  |
| C  | 0.59485200  | -3.32350500 | -1.55478400 |
| C  | 0.62480900  | -2.43683300 | -2.79004100 |
| C  | -0.66429400 | -1.77688700 | -3.28598100 |
| C  | -1.98804300 | -2.02367400 | -2.46721600 |
| C  | -1.98385200 | -2.88619200 | -1.26391600 |
| C  | -0.67074500 | -3.55763300 | -0.79971500 |
| Ag | -1.64656500 | 0.49461300  | 0.01024300  |
| Ag | 1.64653900  | -0.49479500 | -0.01074700 |
| Ag | 0.35265800  | 1.15787300  | 1.23683800  |
| Ag | -0.35222600 | -1.15793800 | -1.23682800 |
| Ag | -0.35065200 | -1.20321300 | 1.19338900  |
| Ag | 0.35011700  | 1.20384500  | -1.19309700 |

### C. Cu-Outside:

# opt freq=raman b3lyp/lanl2dz empiricaldispersion=gd3 geom=connectivity

01

|   |             |             |             |
|---|-------------|-------------|-------------|
| C | 3.21112924  | -1.08248267 | -1.17609223 |
| C | 2.61881016  | -2.32304354 | -0.71953351 |
| C | 1.53816121  | -2.90254706 | -1.44067173 |
| C | 2.68459294  | -0.42186997 | -2.32064817 |
| C | 3.62105969  | -0.31529934 | 0.00120467  |
| C | 2.61871580  | -2.31648558 | 0.73967487  |
| C | 0.42543374  | -3.53498432 | -0.73029850 |
| C | 1.00206274  | -2.23005951 | -2.60620931 |
| C | 2.50994987  | 1.02680626  | -2.32688952 |
| C | 1.58411725  | -1.01199341 | -3.05467188 |
| C | 3.44266043  | 1.16598358  | -0.00527573 |
| C | 3.21091939  | -1.07193532 | 1.18522733  |
| C | 1.53816671  | -2.88957887 | 1.46608771  |
| C | -0.80638133 | -3.18450902 | -1.43908629 |
| C | 0.42544163  | -3.52838696 | 0.76159719  |
| C | -0.44667894 | -2.40440534 | -2.60527065 |
| C | 2.86338426  | 1.80350896  | -1.18874541 |
| C | 1.30159065  | 1.33238738  | -3.06482933 |
| C | 0.74048384  | 0.07342964  | -3.55745285 |
| C | 2.86347970  | 1.81395390  | 1.17258506  |
| C | 2.68482286  | -0.40127394 | 2.32414804  |
| C | 1.00220173  | -2.20690407 | 2.62571755  |
| C | -1.99302136 | -2.87828492 | -0.71679359 |
| C | -0.80637684 | -3.17181803 | 1.46739326  |
| C | -1.30180544 | -1.35939318 | -3.05272359 |
| C | 1.99304291  | 2.87189351  | -0.74239866 |
| C | 0.44654696  | 2.38137164  | -2.62657345 |
| C | -0.74072952 | -0.10492620 | -3.55656101 |
| C | 1.99304825  | 2.87826798  | 0.71680551  |
| C | 2.51042873  | 1.04748848  | 2.31783611  |
| C | 1.58416450  | -0.98484744 | 3.06308565  |
| C | -0.44652333 | -2.38138479 | 2.62659070  |
| C | -1.99301750 | -2.87190912 | 0.74241205  |
| C | -2.86345297 | -1.81396719 | -1.17257221 |
| C | -2.51040374 | -1.04750496 | -2.31782599 |
| C | 0.80640213  | 3.17180560  | -1.46738161 |
| C | -1.00218106 | 2.20689051  | -2.62570186 |
| C | -1.58414240 | 0.98483438  | -3.06307238 |
| C | 0.80640461  | 3.18449327  | 1.43909941  |
| C | 1.30182626  | 1.35937705  | 3.05273403  |
| C | 0.74075193  | 0.10491040  | 3.55657303  |



|    |             |             |             |
|----|-------------|-------------|-------------|
| C  | -1.30156970 | -1.33240193 | 3.06484545  |
| C  | -2.86336019 | -1.80352434 | 1.18875665  |
| C  | -3.44261911 | -1.16599396 | 0.00528818  |
| C  | -2.68479994 | 0.40126007  | -2.32413606 |
| C  | -0.42541697 | 3.52838086  | -0.76158462 |
| C  | -1.53814615 | 2.88956338  | -1.46607525 |
| C  | -0.42540593 | 3.53495074  | 0.73030780  |
| C  | 0.44670329  | 2.40438876  | 2.60528322  |
| C  | -0.74046398 | -0.07344561 | 3.55747446  |
| C  | -2.50992705 | -1.02682039 | 2.32690376  |
| C  | -3.62105171 | 0.31528362  | -0.00119204 |
| C  | -3.21089728 | 1.07191932  | -1.18521776 |
| C  | -2.61869315 | 2.31646658  | -0.73966265 |
| C  | -1.53813745 | 2.90252807  | 1.44068362  |
| C  | -1.00204209 | 2.23004292  | 2.60622397  |
| C  | -1.58409424 | 1.01197844  | 3.05468435  |
| C  | -2.68457214 | 0.42185324  | 2.32066108  |
| C  | -3.21110943 | 1.08246775  | 1.17610633  |
| C  | -2.61878924 | 2.32302334  | 0.71954663  |
| Cu | -0.00012988 | -0.02420028 | -5.52349952 |
| Cu | 5.48424405  | 0.66058162  | -0.00297576 |
| Cu | 0.00012335  | 0.02428553  | 5.52351191  |
| Cu | -5.48422896 | -0.66053305 | 0.00292726  |
| Cu | 0.66034109  | -5.48414625 | 0.02407254  |
| Cu | -0.66049308 | 5.48410995  | -0.02411711 |

#### D. Cu-Inside:

#p opt freq=raman b3lyp/lanl2dz empiricaldispersion=gd3 geom=connectivity

|     |             |             |             |
|-----|-------------|-------------|-------------|
| 0 1 |             |             |             |
| C   | -1.16608930 | -3.32604322 | 1.18359135  |
| C   | 0.26997783  | -3.63704118 | 0.70616437  |
| C   | 1.44474114  | -3.11469640 | 1.46808632  |
| C   | -1.37635763 | -2.51366246 | 2.39906065  |
| C   | -2.01375929 | -3.11864717 | -0.02342952 |
| C   | 0.26829850  | -3.62489644 | -0.76567119 |
| C   | 2.60016608  | -2.52826774 | 0.70149192  |
| C   | 1.25432896  | -2.27700127 | 2.73297656  |
| C   | -2.43737309 | -1.42039848 | 2.39089129  |
| C   | -0.16842271 | -1.97057546 | 3.22918147  |
| C   | -3.09108924 | -2.10748296 | -0.01393233 |
| C   | -1.16847770 | -3.30654367 | -1.23496684 |

|   |             |             |             |
|---|-------------|-------------|-------------|
| C | 1.44157117  | -3.09017587 | -1.52120866 |
| C | 3.14065760  | -1.34586393 | 1.48706057  |
| C | 2.59847726  | -2.51650425 | -0.74768282 |
| C | 2.27570760  | -1.15800166 | 2.68788983  |
| C | -3.30578371 | -1.25761506 | 1.22009974  |
| C | -1.91153100 | -0.24773605 | 3.15232509  |
| C | -0.52279600 | -0.55906100 | 3.62386453  |
| C | -3.30830824 | -1.23751028 | -1.23384721 |
| C | -1.38110938 | -2.47436604 | -2.43691813 |
| C | 1.24875343  | -2.23220489 | -2.77223564 |
| C | 3.73923012  | -0.18225146 | 0.76398491  |
| C | 3.13725499  | -1.32113565 | -1.51505474 |
| C | 1.91791924  | 0.19613324  | 3.15193809  |
| C | -3.73723138 | 0.16978729  | 0.77435814  |
| C | -2.27012292 | 1.11397227  | 2.71106872  |
| C | 0.53032378  | 0.49980243  | 3.63142986  |
| C | -3.73906021 | 0.18230041  | -0.76416757 |
| C | -2.44208785 | -1.38140386 | -2.40855547 |
| C | -0.17524434 | -1.91815887 | -3.26060397 |
| C | 2.27007892  | -1.11404720 | -2.71109875 |
| C | 3.73707753  | -0.16975834 | -0.77454944 |
| C | 3.30843942  | 1.23749818  | 1.23368722  |
| C | 2.44216259  | 1.38131908  | 2.40846079  |
| C | -3.13736057 | 1.32113529  | 1.51497836  |
| C | -1.24880535 | 2.23216909  | 2.77234893  |
| C | 0.17533324  | 1.91787153  | 3.26055399  |
| C | -3.14053436 | 1.34577828  | -1.48712889 |
| C | -1.91782648 | -0.19622736 | -3.15201855 |
| C | -0.53029896 | -0.49986030 | -3.63149019 |
| C | 1.91146355  | 0.24768733  | -3.15238757 |
| C | 3.30564292  | 1.25758281  | -1.22024278 |
| C | 3.09108402  | 2.10743406  | 0.01381158  |
| C | 1.38124098  | 2.47413570  | 2.43678193  |
| C | -2.59850073 | 2.51639366  | 0.74766838  |
| C | -1.44156138 | 3.09009302  | 1.52128955  |
| C | -2.60004121 | 2.52813860  | -0.70150512 |
| C | -2.27556744 | 1.15791874  | -2.68789167 |
| C | 0.52275596  | 0.55895657  | -3.62388771 |
| C | 2.43726078  | 1.42036532  | -2.39097102 |
| C | 2.01377824  | 3.11859107  | 0.02333599  |
| C | 1.16856203  | 3.30642982  | 1.23495771  |
| C | -0.26824395 | 3.62479581  | 0.76571246  |
| C | -1.44463953 | 3.11446255  | -1.46797468 |

|    |             |             |             |
|----|-------------|-------------|-------------|
| C  | -1.25423623 | 2.27681148  | -2.73291953 |
| C  | 0.16830693  | 1.97063206  | -3.22925165 |
| C  | 1.37626330  | 2.51378820  | -2.39926882 |
| C  | 1.16610425  | 3.32609810  | -1.18365489 |
| C  | -0.26994658 | 3.63686900  | -0.70612434 |
| Cu | 1.71836840  | 0.07534806  | 0.00000254  |
| Cu | -1.71838411 | -0.07557196 | 0.00049253  |
| Cu | 0.05684334  | -1.23785323 | 1.20426656  |
| Cu | -0.05633469 | 1.23793070  | -1.20428890 |
| Cu | -0.05554683 | 1.21660981  | 1.22572945  |
| Cu | 0.05498297  | -1.21618412 | -1.22599928 |

### E. Plain:

# opt freq=raman b3lyp/lanl2dz empiricaldispersion=gd3 geom=connectivity

|     |             |             |             |
|-----|-------------|-------------|-------------|
| 0 1 |             |             |             |
| C   | 3.21112924  | -1.08248267 | -1.17609223 |
| C   | 2.61881016  | -2.32304354 | -0.71953351 |
| C   | 1.53816121  | -2.90254706 | -1.44067173 |
| C   | 2.68459294  | -0.42186997 | -2.32064817 |
| C   | 3.62105969  | -0.31529934 | 0.00120467  |
| C   | 2.61871580  | -2.31648558 | 0.73967487  |
| C   | 0.42543374  | -3.53498432 | -0.73029850 |
| C   | 1.00206274  | -2.23005951 | -2.60620931 |
| C   | 2.50994987  | 1.02680626  | -2.32688952 |
| C   | 1.58411725  | -1.01199341 | -3.05467188 |
| C   | 3.44266043  | 1.16598358  | -0.00527573 |
| C   | 3.21091939  | -1.07193532 | 1.18522733  |
| C   | 1.53816671  | -2.88957887 | 1.46608771  |
| C   | -0.80638133 | -3.18450902 | -1.43908629 |
| C   | 0.42544163  | -3.52838696 | 0.76159719  |
| C   | -0.44667894 | -2.40440534 | -2.60527065 |
| C   | 2.86338426  | 1.80350896  | -1.18874541 |
| C   | 1.30159065  | 1.33238738  | -3.06482933 |
| C   | 0.74048384  | 0.07342964  | -3.55745285 |
| C   | 2.86347970  | 1.81395390  | 1.17258506  |
| C   | 2.68482286  | -0.40127394 | 2.32414804  |
| C   | 1.00220173  | -2.20690407 | 2.62571755  |
| C   | -1.99302136 | -2.87828492 | -0.71679359 |
| C   | -0.80637684 | -3.17181803 | 1.46739326  |
| C   | -1.30180544 | -1.35939318 | -3.05272359 |
| C   | 1.99304291  | 2.87189351  | -0.74239866 |

|   |             |             |             |
|---|-------------|-------------|-------------|
| C | 0.44654696  | 2.38137164  | -2.62657345 |
| C | -0.74072952 | -0.10492620 | -3.55656101 |
| C | 1.99304825  | 2.87826798  | 0.71680551  |
| C | 2.51042873  | 1.04748848  | 2.31783611  |
| C | 1.58416450  | -0.98484744 | 3.06308565  |
| C | -0.44652333 | -2.38138479 | 2.62659070  |
| C | -1.99301750 | -2.87190912 | 0.74241205  |
| C | -2.86345297 | -1.81396719 | -1.17257221 |
| C | -2.51040374 | -1.04750496 | -2.31782599 |
| C | 0.80640213  | 3.17180560  | -1.46738161 |
| C | -1.00218106 | 2.20689051  | -2.62570186 |
| C | -1.58414240 | 0.98483438  | -3.06307238 |
| C | 0.80640461  | 3.18449327  | 1.43909941  |
| C | 1.30182626  | 1.35937705  | 3.05273403  |
| C | 0.74075193  | 0.10491040  | 3.55657303  |
| C | -1.30156970 | -1.33240193 | 3.06484545  |
| C | -2.86336019 | -1.80352434 | 1.18875665  |
| C | -3.44261911 | -1.16599396 | 0.00528818  |
| C | -2.68479994 | 0.40126007  | -2.32413606 |
| C | -0.42541697 | 3.52838086  | -0.76158462 |
| C | -1.53814615 | 2.88956338  | -1.46607525 |
| C | -0.42540593 | 3.53495074  | 0.73030780  |
| C | 0.44670329  | 2.40438876  | 2.60528322  |
| C | -0.74046398 | -0.07344561 | 3.55747446  |
| C | -2.50992705 | -1.02682039 | 2.32690376  |
| C | -3.62105171 | 0.31528362  | -0.00119204 |
| C | -3.21089728 | 1.07191932  | -1.18521776 |
| C | -2.61869315 | 2.31646658  | -0.73966265 |
| C | -1.53813745 | 2.90252807  | 1.44068362  |
| C | -1.00204209 | 2.23004292  | 2.60622397  |
| C | -1.58409424 | 1.01197844  | 3.05468435  |
| C | -2.68457214 | 0.42185324  | 2.32066108  |
| C | -3.21110943 | 1.08246775  | 1.17610633  |
| C | -2.61878924 | 2.32302334  | 0.71954663  |

## Simulated Raman

### A. Ag-Outside :

# X-Axis: Frequency (cm-1)  
# Y-Axis: Intensity (Arbitrary)

| # X   | Y                  |
|-------|--------------------|
| 181.0 | 694.253449718592   |
| 184.2 | 734.2942631019232  |
| 187.4 | 810.5454557172809  |
| 190.6 | 915.5698504104373  |
| 193.8 | 1038.8223606968586 |
| 197.0 | 1167.5020893131482 |
| 200.2 | 1287.78799273589   |
| 203.4 | 1386.3741390123869 |
| 206.6 | 1452.114392686155  |
| 209.8 | 1477.493987216193  |
| 213.0 | 1459.5879884299097 |
| 216.2 | 1400.3424957343668 |
| 219.4 | 1306.1815045869166 |
| 222.6 | 1186.7528410565299 |
| 225.8 | 1053.5056133282874 |
| 229.0 | 918.1698651128847  |
| 232.2 | 791.4475887363784  |
| 235.4 | 682.1496702328691  |
| 238.6 | 596.8287052774374  |
| 241.8 | 539.8056824147282  |
| 245.0 | 513.3915569656933  |
| 248.2 | 518.1337436189044  |
| 251.4 | 552.9481030082562  |
| 254.6 | 615.0948815537591  |
| 257.8 | 700.0594272245196  |
| 261.0 | 801.473667685679   |
| 264.2 | 911.2349996134174  |
| 267.4 | 1019.9417126566441 |
| 270.6 | 1117.675333847869  |
| 273.8 | 1195.050184489981  |
| 277.0 | 1244.3846177665441 |
| 280.2 | 1260.6830624197114 |
| 283.4 | 1242.1869916455405 |
| 286.6 | 1190.5639954921394 |
| 289.8 | 1110.5119821623496 |
| 293.0 | 1008.9040594295517 |
| 296.2 | 893.7195989757856  |
| 299.4 | 772.9599730701407  |
| 302.6 | 653.7425828491778  |
| 305.8 | 541.698682820776   |
| 309.0 | 440.7034960018745  |
| 312.2 | 352.90576036710786 |

315.4 278.97196672898036  
318.6 218.4390817833397  
321.8 170.09181437506345  
325.0 132.30295523160194  
328.2 103.30386773692928  
331.4 81.37582318976473  
334.6 64.96822611999532  
337.8 52.75709822351837  
341.0 43.659404822336086  
344.2 36.83558987883812  
347.4 31.664838032081747  
350.6 27.66217620787264  
353.8 24.497141633668342  
357.0 21.920460048619443  
360.2 19.766059268330817  
363.4 17.926618606495467  
366.6 16.337949202619857  
369.8 14.959683388616602  
373.0 13.762449628357793  
376.2 12.73163130647679  
379.4 11.861283018675845  
382.6 11.148738034983465  
385.8 10.598203113349133  
389.0 10.220768199514016  
392.2 10.03628263526676  
395.4 10.076505653560789  
398.6 10.38800208273271  
401.8 11.032842704836463  
405.0 12.085883381449902  
408.2 13.630779256809934  
411.4 15.748219015506493  
414.6 18.499896925501655  
417.8 21.909464816570843  
421.0 25.94353958038028  
424.2 30.497383118404397  
427.4 35.39012111906412  
430.6 40.373131277052515  
433.8 45.15248223234574  
437.0 49.42267750833526  
440.2 52.905360546335025  
443.4 55.38510214095395  
446.6 56.734397020105256  
449.8 56.92289416107611

|       |                    |
|-------|--------------------|
| 453.0 | 56.01051949107746  |
| 456.2 | 54.12882896113915  |
| 459.4 | 51.456119195806906 |
| 462.6 | 48.193927958380726 |
| 465.8 | 44.54979348963386  |
| 469.0 | 40.72746281777626  |
| 472.2 | 36.918768734743985 |
| 475.4 | 33.30804361369936  |
| 478.6 | 30.07412055582751  |
| 481.8 | 27.391472051566126 |
| 485.0 | 25.43179770375954  |
| 488.2 | 24.355246029049155 |
| 491.4 | 24.32683390390796  |
| 494.6 | 25.523475873875544 |
| 497.8 | 28.136569929803287 |
| 501.0 | 32.37578598757853  |
| 504.2 | 38.46573826672602  |
| 507.4 | 46.63199690834383  |
| 510.6 | 57.07609102421995  |
| 513.8 | 69.93620998170255  |
| 517.0 | 85.23655068613151  |
| 520.2 | 102.84665850465387 |
| 523.4 | 122.42867012379227 |
| 526.6 | 143.42758220782065 |
| 529.8 | 165.08007434688588 |
| 533.0 | 186.46092279609618 |
| 536.2 | 206.57420246052052 |
| 539.4 | 224.47731584928545 |
| 542.6 | 239.42592560174756 |
| 545.8 | 251.00765875429647 |
| 549.0 | 259.22752459743117 |
| 552.2 | 264.53781783020474 |
| 555.4 | 267.76555418335613 |
| 558.6 | 269.95402865564415 |
| 561.8 | 272.21870271083196 |
| 565.0 | 275.54828679461576 |
| 568.2 | 280.67455317810237 |
| 571.4 | 288.03636681727943 |
| 574.6 | 297.84235746729377 |
| 577.8 | 310.2063996594757  |
| 581.0 | 325.2999659208743  |
| 584.2 | 343.4517193668811  |
| 587.4 | 365.1346788735592  |

590.6 390.81576718892507  
593.8 420.68886869250156  
597.0 454.3584898598771  
600.2 490.5777611502553  
603.4 527.1535805945805  
606.6 561.0699601584446  
609.8 588.8656055845893  
613.0 607.1994951061961  
616.2 613.4440973500199  
619.4 606.2793595580924  
622.6 586.0433422588583  
625.8 554.7924749858337  
629.0 516.0874751971426  
632.2 474.51743897441884  
635.4 435.1003681778835  
638.6 402.7167146869031  
641.8 381.63883596619394  
645.0 375.1945966369842  
648.2 385.60428330910855  
651.4 413.95061518543423  
654.6 460.22812129400313  
657.8 523.4309057049791  
661.0 601.6624064292585  
664.2 692.2537177351635  
667.4 791.8691517950112  
670.6 896.637560798256  
673.8 1002.3073960694345  
677.0 1104.4243296263369  
680.2 1198.5307529334737  
683.4 1280.3848051395867  
686.6 1346.2092100144987  
689.8 1392.9488092642518  
693.0 1418.4758380977992  
696.2 1421.8103613034657  
699.4 1403.22185691172  
702.6 1364.218228889358  
705.8 1307.390684178479  
709.0 1236.1568911023169  
712.2 1154.4472629245251  
715.4 1066.3887420963974  
718.6 976.0305270272581  
721.8 887.1274654754263  
725.0 802.9713592840078



728.2 726.248953565636  
731.4 658.9066633814529  
734.6 602.0225322855433  
737.8 555.7223133651337  
741.0 519.168048415414  
744.2 490.65769362297476  
747.4 467.8671878207377  
750.6 448.1327321401274  
753.8 428.8379015262649  
757.0 407.8007588475167  
760.2 383.5516877044495  
763.4 355.4970447186098  
766.6 323.914937730951  
769.8 289.78654637815714  
773.0 254.55154687035488  
776.2 219.83766171133698  
779.4 187.18652404313977  
782.6 157.84760018309677  
785.8 132.66826095261288  
789.0 112.0659989855401  
792.2 96.09830515167553  
795.4 84.5789658473555  
798.6 77.2370560179421  
801.8 73.81114063365509  
805.0 74.14599474566147  
808.2 78.36918372253203  
811.4 86.91283441074962  
814.6 100.55310787560295  
817.8 120.43650304226216  
821.0 148.05002815892655  
824.2 185.14920193224629  
827.4 233.6148162057531  
830.6 295.2185754740177  
833.8 371.2976448887926  
837.0 462.350720391758  
840.2 567.659620438044  
843.4 684.9291505039354  
846.6 810.097944324615  
849.8 937.4142218090454  
853.0 1059.8446793654234  
856.2 1169.8173295229622  
859.4 1260.2125343318705  
862.6 1325.416324208866

865.8 1362.2175444057202  
869.0 1370.3258907444026  
872.2 1352.3321915477986  
875.4 1313.2074712041124  
878.6 1259.3512669842698  
881.8 1197.4744821835027  
885.0 1133.5837041106113  
888.2 1072.2985256244299  
891.4 1016.6206159894565  
894.6 968.1267626400695  
897.8 927.4526133196982  
901.0 894.8380692676985  
904.2 870.5420107604215  
907.4 854.9758856112127  
910.6 848.5353946135298  
913.8 851.2161334910469  
917.0 862.1749432727952  
920.2 879.4056050409978  
923.4 899.6827233523524  
926.6 918.8316194264743  
929.8 932.2781045277576  
933.0 935.7809062934281  
936.2 926.1012028422385  
939.4 901.4448577141408  
942.6 861.7505852379984  
945.8 808.5646373543173  
949.0 744.6586737984085  
952.2 673.5142023446314  
955.4 598.7796371852307  
958.6 523.8233653872418  
961.8 451.4412252094413  
965.0 383.7299466808273  
968.2 322.10510296795525  
971.4 267.35468715624705  
974.6 219.7791498783636  
977.8 179.30734922929054  
981.0 145.59084917170358  
984.2 118.07798412021657  
987.4 96.07434261172844  
990.6 78.79622786114957  
993.8 65.42839055566921  
997.0 55.174853043991625  
1000.2 47.30530468460912

1003.4 41.20707061469383  
1006.6 36.36128519817196  
1009.8 32.369449801461215  
1013.0 28.948710681035486  
1016.2 25.916427347192563  
1019.4 23.16811278609564  
1022.6 20.65397728890696  
1025.8 18.360228175423398  
1029.0 16.287314286877113  
1032.2 14.44094700801411  
1035.4 12.820285305395792  
1038.6 11.417601190052903  
1041.8 10.218579384684434  
1045.0 9.203172728622675  
1048.2 8.348132596891471  
1051.4 7.629816044892033  
1054.6 7.026525857567689  
1057.8 6.520162881339331  
1061.0 6.0973394946269535  
1064.2 5.750201789477543  
1067.4 5.474906020691491  
1070.6 5.272829466145781  
1073.8 5.153527650829683  
1077.0 5.135530936854316  
1080.2 5.248767129715767  
1083.4 5.536460571280171  
1086.6 6.056725784348291  
1089.8 6.8819266700528665  
1093.0 8.094381924041686  
1096.2 9.777024457298262  
1099.4 11.99991331549441  
1102.6 14.80268447857028  
1105.8 18.175111376647752  
1109.0 22.03876163329856  
1112.2 26.241208529328716  
1115.4 30.5609903609419  
1118.6 34.727595470118175  
1121.8 38.45701103738985  
1125.0 41.49670831840706  
1128.2 43.67094309812735  
1131.4 44.9156272347703  
1134.6 45.29318350432857  
1137.8 44.98191683765685

1141.0 44.240538113830425  
1144.2 43.354884251942735  
1147.4 42.57851639842178  
1150.6 42.08067385739349  
1153.8 41.913392053352986  
1157.0 42.004903936262195  
1160.2 42.180169441068045  
1163.4 42.203129803297045  
1166.6 41.830341967735805  
1169.8 40.86382320797655  
1173.0 39.191523517322764  
1176.2 36.807644330310076  
1179.4 33.810316002421274  
1182.6 30.37939747873312  
1185.8 26.741497067099132  
1189.0 23.131225843620758  
1192.2 19.757224937038135  
1195.4 16.77914748205062  
1198.6 14.299466857913153  
1201.8 12.365323695418779  
1205.0 10.977514951634767  
1208.2 10.108046391397924  
1211.4 9.724453731044624  
1214.6 9.80490238155734  
1217.8 10.350064072414433  
1221.0 11.394853980897532  
1224.2 13.019700058954419  
1227.4 15.353760896235674  
1230.6 18.576362390914035  
1233.8 22.90448175282753  
1237.0 28.573176050637716  
1240.2 35.82601633065488  
1243.4 44.8896669246089  
1246.6 55.94283128510343  
1249.8 69.09740744468667  
1253.0 84.38851538200544  
1256.2 101.77725407086477  
1259.4 121.1639659321967  
1262.6 142.4030965732118  
1265.8 165.3069123269517  
1269.0 189.62590097818116  
1272.2 215.00033775671096  
1275.4 240.88966628242213

1278.6 266.5006903279732  
1281.8 290.74638944729793  
1285.0 312.26803803605003  
1288.2 329.53535804464826  
1291.4 341.0392596937755  
1294.6 345.5418900195177  
1297.8 342.32025702555336  
1301.0 331.3554620149842  
1304.2 313.4352146629965  
1307.4 290.1067424335781  
1310.6 263.5085630653714  
1313.8 236.110928952771  
1317.0 210.40862127598814  
1320.2 188.66408054314908  
1323.4 172.69187127695963  
1326.6 163.72784165192817  
1329.8 162.3872178695495  
1333.0 168.6774545390424  
1336.2 182.06520437222977  
1339.4 201.60036020254165  
1342.6 226.0219565043996  
1345.8 253.89377849287442  
1349.0 283.74019012419285  
1352.2 314.16956392987737  
1355.4 343.9760794231728  
1358.6 372.2110580474407  
1361.8 398.20318038577034  
1365.0 421.53125712085546  
1368.2 441.9463129311926  
1371.4 459.28301445953974  
1374.6 473.36954103662674  
1377.8 483.9716102969253  
1381.0 490.778803267515  
1384.2 493.45416797208486  
1387.4 491.740451273125  
1390.6 485.5964661954424  
1393.8 475.3082840232514  
1397.0 461.58050454569843  
1400.2 445.5271258247996  
1403.4 428.55059346783094  
1406.6 412.14588224441115  
1409.8 397.65869492705446  
1413.0 386.0651487871968

1416.2 377.8332761874911  
1419.4 372.90599438148945  
1422.6 370.79266652674255  
1425.8 370.74398607509534  
1429.0 371.9521691513261  
1432.2 373.695332906257  
1435.4 375.37780691522596  
1438.6 376.52091571991025  
1441.8 376.6762608167589  
1445.0 375.3574829064253  
1448.2 372.0373078976502  
1451.4 366.1968856666373  
1454.6 357.474691436904  
1457.8 345.87619843359084  
1461.0 331.9101245276679  
1464.2 316.66160829979464  
1467.4 301.7310391315399  
1470.6 289.03581490210007  
1473.8 280.56444090888544  
1477.0 278.0885784981434  
1480.2 282.8940377992859  
1483.4 295.5852508542725  
1486.6 315.9890319207137  
1489.8 343.1650186142604  
1493.0 375.5002736216169  
1496.2 410.8848399425075  
1499.4 446.94133525187016  
1502.6 481.2318566098594  
1505.8 511.53726222901486  
1509.0 536.1008883156445  
1512.2 553.8162764378282  
1515.4 564.3635237399093  
1518.6 568.263284459299  
1521.8 566.8386422789138  
1525.0 562.0730323364977  
1528.2 556.3404036257309  
1531.4 552.1224059938727  
1534.6 551.7937298297272  
1537.8 557.3387628732717  
1541.0 570.1927520930011  
1544.2 591.1967531942715  
1547.4 620.6840898323935  
1550.6 658.659409495532

1553.8 705.0011013529098  
1557.0 759.6174326629123  
1560.2 822.5379930902134  
1563.4 893.7904047579032  
1566.6 973.0775032144494  
1569.8 1059.375835706315  
1573.0 1150.6108268971896  
1576.2 1243.468033696206  
1579.4 1333.5825495041986  
1582.6 1416.0760151976053  
1585.8 1486.3955910846728  
1589.0 1541.228152884058  
1592.2 1579.284717272732  
1595.4 1601.6417413160766  
1598.6 1611.5228256327016  
1601.8 1613.5273483017968  
1605.0 1612.4738515598006  
1608.2 1612.1456291548516  
1611.4 1614.276349305842  
1614.6 1618.0264154850584  
1617.8 1620.0689239064086  
1621.0 1615.2549286937774  
1624.2 1597.7848646098514  
1627.4 1562.4898116993375  
1630.6 1506.0024616610567  
1633.8 1427.6300971392138  
1637.0 1329.6441845795819  
1640.2 1217.0823279535962  
1643.4 1097.0783986167094  
1646.6 977.8626170160719  
1649.8 867.6570082506944  
1653.0 773.6297235837508  
1656.2 701.095631686919  
1659.4 653.0306487973668  
1662.6 629.8718993305924  
1665.8 629.6089259947421  
1669.0 648.2324139672394  
1672.2 680.3180431631008  
1675.4 719.7173415493036  
1678.6 760.2799292946936  
1681.8 796.5293330225767  
1685.0 824.2004161202196  
1688.2 840.5748901041081

1691.4 844.5290857184588  
1694.6 836.4041312312538  
1697.8 817.6850686359373  
1701.0 790.5284155727329  
1704.2 757.2832732011198  
1707.4 720.1346302322196  
1710.6 680.8335776636076  
1713.8 640.6183061734143  
1717.0 600.244330141165  
1720.2 560.1015891668244  
1723.4 520.3674585383063  
1726.6 481.1388693241823  
1729.8 442.515811441962  
1733.0 404.6321901113038  
1736.2 367.6488702234479  
1739.4 331.7329208655533  
1742.6 297.04435841494654  
1745.8 263.7406093859942  
1749.0 232.00345859753708  
1752.2 202.06627094594037  
1755.4 174.19957682379356  
1758.6 148.73668810985833  
1761.8 126.05788761468105  
1765.0 106.5367542483675  
1768.2 90.51456352516468  
1771.4 78.26575093937761  
1774.6 69.99091122051175  
1777.8 65.82473946296373

**B. Ag- inside:**

# X-Axis: Frequency (cm-1)  
# Y-Axis: Intensity (Arbitrary)

| #    | X                  | Y |
|------|--------------------|---|
| 0.0  | 5.448762079091105  |   |
| 3.2  | 5.9631754341855565 |   |
| 6.4  | 6.994694853219672  |   |
| 9.6  | 8.541202153994668  |   |
| 12.8 | 10.58749425274179  |   |
| 16.0 | 13.094872406848994 |   |
| 19.2 | 15.991921906840492 |   |
| 22.4 | 19.17036381772357  |   |



|       |                    |
|-------|--------------------|
| 25.6  | 22.488281437806194 |
| 28.8  | 25.781413137629016 |
| 32.0  | 28.876967957128365 |
| 35.2  | 31.61276908296388  |
| 38.4  | 33.853853100613335 |
| 41.6  | 35.502647199099975 |
| 44.8  | 36.50221022713625  |
| 48.0  | 36.83328328124074  |
| 51.2  | 36.507795530098704 |
| 54.4  | 35.562169425398    |
| 57.6  | 34.0529374899494   |
| 60.8  | 32.05532438810752  |
| 64.0  | 29.663482071031247 |
| 67.2  | 26.989910587190483 |
| 70.4  | 24.16175772262658  |
| 73.6  | 21.313037629875453 |
| 76.8  | 18.573397626325058 |
| 80.0  | 16.056060192126033 |
| 83.2  | 13.847551226394055 |
| 86.4  | 12.001703968897937 |
| 89.6  | 10.5390232766725   |
| 92.8  | 9.451038496319946  |
| 96.0  | 8.708120281354823  |
| 99.2  | 8.268703361114676  |
| 102.4 | 8.088049689547848  |
| 105.6 | 8.125797091461363  |
| 108.8 | 8.350764775149552  |
| 112.0 | 8.741666031737186  |
| 115.2 | 9.290027895419229  |
| 118.4 | 10.001428033580213 |
| 121.6 | 10.898978158783347 |
| 124.8 | 12.026275064549242 |
| 128.0 | 13.435686475430394 |
| 131.2 | 15.221001621338178 |
| 134.4 | 17.53089864225328  |
| 137.6 | 20.581798205264203 |
| 140.8 | 24.6620967540307   |
| 144.0 | 30.186027711341485 |
| 147.2 | 37.7044238606293   |
| 150.4 | 47.90713308477516  |
| 153.6 | 61.606760526518805 |
| 156.8 | 79.68769330453495  |
| 160.0 | 103.01303248239746 |

163.2 132.28862002278058  
166.4 167.89388813666613  
169.6 209.7023787728437  
172.8 256.92630571693684  
176.0 308.0270367346427  
179.2 360.725307373795  
182.4 412.1408780807112  
185.6 459.0564831364438  
188.8 498.3041732655621  
192.0 527.2177298763628  
195.2 544.0591882596705  
198.4 548.3543493863566  
201.6 541.0768376602357  
204.8 524.6285855113845  
208.0 502.60380452829037  
211.2 479.35830743729827  
214.4 459.43887680256955  
217.6 446.94962500018534  
220.8 444.9455103911425  
224.0 454.94448967596963  
227.2 476.6412382269888  
230.4 507.88736273167166  
233.6 544.9421307014063  
236.8 582.9551492231305  
240.0 616.7801230821796  
243.2 641.791854506939  
246.4 654.6736986687072  
249.6 654.029786111073  
252.8 640.6913508217275  
256.0 617.6573061290028  
259.2 589.6785588318468  
262.4 562.5182045673562  
265.6 542.0762221940597  
268.8 533.4845678890022  
272.0 540.28331830983  
275.2 563.7770786507307  
278.4 602.8509699640417  
281.6 654.0636524619215  
284.8 712.1065259713023  
288.0 770.6815075494005  
291.2 823.5622026359636  
294.4 865.6977164227376  
297.6 894.1615771064687

|       |                    |
|-------|--------------------|
| 300.8 | 908.7292700158143  |
| 304.0 | 911.9338600055269  |
| 307.2 | 908.5281270914899  |
| 310.4 | 904.5288637361783  |
| 313.6 | 905.9609741304166  |
| 316.8 | 917.5912105631287  |
| 320.0 | 941.9251583016737  |
| 323.2 | 978.6588206717905  |
| 326.4 | 1024.8214177982663 |
| 329.6 | 1075.414116179083  |
| 332.8 | 1124.445658342585  |
| 336.0 | 1166.145436671073  |
| 339.2 | 1196.0711322531897 |
| 342.4 | 1211.8745739182696 |
| 345.6 | 1213.576246790136  |
| 348.8 | 1203.3174554769682 |
| 352.0 | 1184.6781940409608 |
| 355.2 | 1161.7421083694217 |
| 358.4 | 1138.1357049266087 |
| 361.6 | 1116.2610699747977 |
| 364.8 | 1096.8828376763374 |
| 368.0 | 1079.0718076293979 |
| 371.2 | 1060.5760031864227 |
| 374.4 | 1038.5354878400299 |
| 377.6 | 1010.2696761929437 |
| 380.8 | 974.0413237242791  |
| 384.0 | 929.6437026776208  |
| 387.2 | 878.6940922279534  |
| 390.4 | 824.5740871999976  |
| 393.6 | 772.0179807135789  |
| 396.8 | 726.4091079393991  |
| 400.0 | 692.8921714361504  |
| 403.2 | 675.4594936186343  |
| 406.4 | 676.1447389219394  |
| 409.6 | 694.4277508389198  |
| 412.8 | 727.1237921304297  |
| 416.0 | 768.6841451113625  |
| 419.2 | 811.8651425976072  |
| 422.4 | 848.7955563751558  |
| 425.6 | 872.1870089924364  |
| 428.8 | 876.4597950903276  |
| 432.0 | 858.580748000497   |
| 435.2 | 818.4522884570099  |

438.4 758.7831624179877  
441.6 684.4533496120914  
444.8 601.639001112679  
448.0 516.8159207404215  
451.2 435.8775851663957  
454.4 363.5384628119715  
457.6 303.00555830808736  
460.8 256.0214712106895  
464.0 223.1259560274274  
467.2 203.99164724413095  
470.4 197.73932148697136  
473.6 203.1682851738934  
476.8 218.87568225573133  
480.0 243.2636333039102  
483.2 274.5184697768919  
486.4 310.5926662792865  
489.6 349.24350023548084  
492.8 388.13777700715053  
496.0 425.07037563616757  
499.2 458.2201590751018  
502.4 486.2589086406478  
505.6 508.52437676986494  
508.8 525.068751432377  
512.0 536.5493023081236  
515.2 544.0826121554679  
518.4 549.0557440053751  
521.6 552.9262745860009  
524.8 557.0572438230428  
528.0 562.5867724496349  
531.2 570.333403651424  
534.4 580.7300391120796  
537.6 593.7779946814142  
540.8 609.0283455924698  
544.0 625.6003106568235  
547.2 642.2478683638492  
550.4 657.4330756794434  
553.6 669.5098757899568  
556.8 676.936075594386  
560.0 678.4722474299324  
563.2 673.3961022960503  
566.4 661.6837496683785  
569.6 644.1350125085863  
572.8 622.3909419153836

576.0 598.8158276809074  
579.2 576.2698491444728  
582.4 557.7533191409813  
585.6 545.9505679431792  
588.8 542.7542962138064  
592.0 548.8539678302011  
595.2 563.5263586900247  
598.4 584.6508183928756  
601.6 609.0081004243198  
604.8 632.8197491827443  
608.0 652.4299534985403  
611.2 664.9971381904897  
614.4 669.0090541116041  
617.6 664.5300239679401  
620.8 653.0960236745517  
624.0 637.2920002564487  
627.2 620.0849667838008  
630.4 604.1345085210079  
633.6 591.2244815685165  
636.8 581.9087410250471  
640.0 575.5064665371231  
643.2 570.3870432573025  
646.4 564.4385739997365  
649.6 555.6420645495423  
652.8 542.5965963335323  
656.0 524.8554600430475  
659.2 503.0481168500853  
662.4 478.7413834506486  
665.6 454.12426795176236  
668.8 431.5921320360301  
672.0 413.34508370698103  
675.2 401.0680738930969  
678.4 395.779898437031  
681.6 397.8723001763863  
684.8 407.2365139025159  
688.0 423.51036028781454  
691.2 446.3651435035455  
694.4 475.6605824313297  
697.6 511.4510013642986  
700.8 553.8263463540945  
704.0 602.6158282332691  
707.2 657.0350574098325  
710.4 715.3965677297402

713.6 774.9644511485421  
716.8 832.0711650645949  
720.0 882.4931841649995  
723.2 922.0174828269382  
726.4 947.0409112223953  
729.6 955.160849116612  
732.8 945.5487714841936  
736.0 919.0366028429384  
739.2 877.925180961577  
742.4 825.5713087231109  
745.6 765.8561843939272  
748.8 702.649968603163  
752.0 639.3733438350796  
755.2 578.706513308571  
758.4 522.4618916264162  
761.6 471.59843038968506  
764.8 426.3350399460787  
768.0 386.3293780032251  
771.2 350.86505478638236  
774.4 319.0523666704581  
777.6 289.9932030569359  
780.8 262.9109245338251  
784.0 237.24173681042635  
787.2 212.6877291792298  
790.4 189.19597709101888  
793.6 166.95109558657012  
796.8 146.32716341247496  
800.0 127.8161636459302  
803.2 111.96161403200267  
806.4 99.3202584156437  
809.6 90.42730572289871  
812.8 85.77921757777929  
816.0 85.81293400829898  
819.2 90.87046132593392  
822.4 101.12566904066941  
825.6 116.50402790492696  
828.8 136.58463819502782  
832.0 160.50755327023018  
835.2 186.92840396196502  
838.4 214.05248561957015  
841.6 239.7595223233228  
844.8 261.86074713858426  
848.0 278.3950470556069

851.2 287.93878393104325  
854.4 289.8987117832156  
857.6 284.6421867456893  
860.8 273.52087857579926  
864.0 258.72712077401906  
867.2 243.02701638916787  
870.4 229.4301412318602  
873.6 220.85023719845967  
876.8 219.78046195840898  
880.0 228.06335748295874  
883.2 246.7352234646283  
886.4 275.921929212757  
889.6 314.81414824004315  
892.8 361.71302977220165  
896.0 414.14892286174705  
899.2 469.0813915445141  
902.4 523.17817240118  
905.6 573.1499037962029  
908.8 616.0910529655187  
912.0 649.7739623211532  
915.2 672.8420508557238  
918.4 684.8647024888007  
921.6 686.2579526853813  
924.8 678.0640416442932  
928.0 661.6888618860303  
931.2 638.6624892130923  
934.4 610.4440221614914  
937.6 578.3137718644338  
940.8 543.3486023215363  
944.0 506.4555823364125  
947.2 468.4191173989385  
950.4 429.9406300841201  
953.6 391.65883600745104  
956.8 354.1544339081123  
960.0 317.9508368976962  
963.2 283.5195013817325  
966.4 251.29050524063732  
969.6 221.66433245022944  
972.8 195.01053715001072  
976.0 171.63196503474273  
979.2 151.74555460422673  
982.4 135.4638752305324  
985.6 122.76299219044436

988.8 113.52187163360658  
992.0 107.54497945020546  
995.2 104.64160172999651  
998.4 104.70445644090222  
1001.6 107.7557489107939  
1004.8 113.94797950880141  
1008.0 123.52884249782122  
1011.2 136.7137576446383  
1014.4 153.55354777996536  
1017.6 173.80710670758083  
1020.8 196.84241657848173  
1024.0 221.6123508633084  
1027.2 246.7422351756612  
1030.4 270.7168219333556  
1033.6 292.1156484663879  
1036.8 309.85769010181104  
1040.0 323.389736459345  
1043.2 332.75857906918645  
1046.4 338.5436543001306  
1049.6 341.6675245505726  
1052.8 343.13420084680126  
1056.0 343.7645171200605  
1059.2 343.99859987464197  
1062.4 343.8116216685358  
1065.6 342.75418224760483  
1068.8 340.09663565781614  
1072.0 335.0332913444961  
1075.2 326.8893909466619  
1078.4 315.2907109975219  
1081.6 300.25853056249383  
1084.8 282.2551942167712  
1088.0 262.1699083230764  
1091.2 241.24949644910427  
1094.4 220.99154194878298  
1097.6 203.05381842057275  
1100.8 189.19076792528026  
1104.0 181.13460752065058  
1107.2 180.53159197969282  
1110.4 188.89123013834944  
1113.6 207.48011409871128  
1116.8 237.24105105490088  
1120.0 278.715241639502  
1123.2 331.93518740130446



1126.4 396.3348810958753  
1129.6 470.68341646898386  
1132.8 553.0639425681304  
1136.0 640.9007086825591  
1139.2 731.0302734817095  
1142.4 819.8326262386356  
1145.6 903.3975337375936  
1148.8 977.7321326158722  
1152.0 1039.0273878669718  
1155.2 1083.9567167528637  
1158.4 1109.9552934474998  
1161.6 1115.531310663392  
1164.8 1100.5269388490797  
1168.0 1066.2543517751615  
1171.2 1015.4815633898579  
1174.4 952.263237440775  
1177.6 881.6118599586008  
1180.8 809.0184177665237  
1184.0 739.904651545315  
1187.2 679.0709669438226  
1190.4 630.2108173095747  
1193.6 595.5531874648259  
1196.8 575.6769731149146  
1200.0 569.5179523479958  
1203.2 574.5624036163244  
1206.4 587.202813173705  
1209.6 603.2086176791589  
1212.8 618.2455456633696  
1216.0 628.3571697309503  
1219.2 630.3781480278467  
1222.4 622.2304323062743  
1225.6 603.0661260338579  
1228.8 573.2254430500653  
1232.0 534.0699530579993  
1235.2 487.78255207583044  
1238.4 437.0362861934852  
1241.6 384.66904858912045  
1244.8 333.424605530343  
1248.0 285.71243416379394  
1251.2 243.4296846618176  
1254.4 207.89055921164146  
1257.6 179.81569386312142  
1260.8 159.3753891406241

1264.0 146.26535371467517  
1267.2 139.81211571602847  
1270.4 139.07166104897976  
1273.6 142.9431428765705  
1276.8 150.26744232145384  
1280.0 159.94486516234392  
1283.2 171.0374248044754  
1286.4 182.8862271470126  
1289.6 195.21559239104604  
1292.8 208.13833010166312  
1296.0 222.1029759452776  
1299.2 237.75649974138508  
1302.4 255.72251356361193  
1305.6 276.3199324489981  
1308.8 299.3133377015427  
1312.0 323.8183897731138  
1315.2 348.3085277044911  
1318.4 370.80222104495544  
1321.6 389.2365694544512  
1324.8 401.89331094855584  
1328.0 407.81323514597443  
1331.2 407.09108016642466  
1334.4 400.9675352811654  
1337.6 391.6827536217359  
1340.8 382.1080999243034  
1344.0 375.22595585033497  
1347.2 373.5612656670965  
1350.4 378.6756197095106  
1353.6 390.82503721679967  
1356.8 408.84893351607303  
1360.0 430.31691390335857  
1363.2 451.8966685541481  
1366.4 469.8790695042854  
1369.6 480.7801012339711  
1372.8 481.8867019889136  
1376.0 471.65860920536846  
1379.2 449.9194533679684  
1382.4 417.8136581540845  
1385.6 377.5539430546461  
1388.8 332.0240405147962  
1392.0 284.3279033769749  
1395.2 237.3673213251804  
1398.4 193.51421903858665

1401.6 154.43153274287042  
1404.8 121.02311060095857  
1408.0 93.51990396892772  
1411.2 71.62916606967302  
1414.4 54.71385379023674  
1417.6 41.96502462252073  
1420.8 32.5413487028295  
1424.0 25.664710890989127  
1427.2 20.672702437126937  
1430.4 17.03622951618971  
1433.6 14.353231362339056  
1436.8 12.336083237111525  
1440.0 10.789128188908403  
1443.2 9.564687530186228  
1446.4 8.568203484788274  
1449.6 7.744553221845756  
1452.8 7.046284099395895  
1456.0 6.442079625737996  
1459.2 5.911557616287494  
1462.4 5.44011555466772  
1465.6 5.016594329648536  
1468.8 4.632248699002333  
1472.0 4.28017754556907  
1475.2 3.955054195381501  
1478.4 3.652996702941257  
1481.6 3.371391106242283  
1484.8 3.1086844601138255  
1488.0 2.8640906531731622  
1491.2 2.6372311756446094  
1494.4 2.427756453233217  
1497.6 2.235009695377892  
1500.8 2.057791663061622  
1504.0 1.8942752755469836  
1507.2 1.7420802694860278  
1510.4 1.5984957322272284  
1513.6 1.4608051814311713  
1516.8 1.3266500702899133  
1520.0 1.194363791100078  
1523.2 1.0631925404521816  
1526.4 0.933400113166678  
1529.6 0.806188291006432  
1532.8 0.6834761511045414  
1536.0 0.5675721602485148

1539.2 0.460800358721334  
1542.4 0.36514811464760916  
1545.6 0.28199452665451014  
1548.8 0.21195804679233277  
1552.0 0.154879046631269  
1555.2 0.10989890935075083  
1558.4 0.07565988839253293  
1561.6 0.050489346857571005  
1564.8 0.03263170137826394  
1568.0 0.020410058106358007  
1571.2 0.012344207432396778  
1574.4 0.0072127643489160245  
1577.6 0.00406676828270693  
1580.8 0.002208677833517098  
1584.0 0.0011518236738745483  
1587.2 0.0005731691979553373  
1590.4 0.0002683674625866483  
1593.6 0.00011406681811949786  
1596.8 6.073689551757313e-05

**C. Cu- outside:**

# X-Axis: Frequency (cm-1)  
# Y-Axis: Intensity (Arbitrary)

| #    | X                  | Y |
|------|--------------------|---|
| 0.0  | 169.51369993420553 |   |
| 3.2  | 195.87306808580792 |   |
| 6.4  | 244.69302070206493 |   |
| 9.6  | 317.6007244501958  |   |
| 12.8 | 425.565408468842   |   |
| 16.0 | 598.5538059735089  |   |
| 19.2 | 907.5864724311099  |   |
| 22.4 | 1528.2704636880962 |   |
| 25.6 | 2842.0081847086713 |   |
| 28.8 | 5154.316426302985  |   |
| 32.0 | 7396.055881738591  |   |
| 35.2 | 7356.725929127707  |   |
| 38.4 | 5087.106347905501  |   |
| 41.6 | 2803.1022841440554 |   |
| 44.8 | 1520.7534802572332 |   |
| 48.0 | 923.2622411399927  |   |
| 51.2 | 639.4130931030056  |   |

|       |                    |
|-------|--------------------|
| 54.4  | 497.235201218865   |
| 57.6  | 409.51764639538214 |
| 60.8  | 329.3266877298121  |
| 64.0  | 257.6382521040229  |
| 67.2  | 206.60700516887084 |
| 70.4  | 173.83397671838378 |
| 73.6  | 152.22239945625148 |
| 76.8  | 137.30399773074063 |
| 80.0  | 126.84344767602592 |
| 83.2  | 119.65187098509872 |
| 86.4  | 115.04281041357221 |
| 89.6  | 112.61255212083228 |
| 92.8  | 112.15842303349964 |
| 96.0  | 113.65722673680074 |
| 99.2  | 117.12737246641139 |
| 102.4 | 122.57377985339772 |
| 105.6 | 130.2611819573504  |
| 108.8 | 140.70632291665333 |
| 112.0 | 154.6321650211904  |
| 115.2 | 173.11785129950889 |
| 118.4 | 197.84576468960313 |
| 121.6 | 231.54095900435158 |
| 124.8 | 278.86048429566193 |
| 128.0 | 348.36864519673037 |
| 131.2 | 457.4381133703266  |
| 134.4 | 645.7738684257988  |
| 137.6 | 1010.9913700241889 |
| 140.8 | 1750.1118732266032 |
| 144.0 | 2964.052202166421  |
| 147.2 | 4019.2118637478216 |
| 150.4 | 3961.610640339476  |
| 153.6 | 3177.587653714911  |
| 156.8 | 2880.7983092391496 |
| 160.0 | 3820.2884569814373 |
| 163.2 | 6213.485714928907  |
| 166.4 | 8799.325124293693  |
| 169.6 | 8903.71225776408   |
| 172.8 | 6281.874433493828  |
| 176.0 | 3506.7182358565096 |
| 179.2 | 1909.394704367065  |
| 182.4 | 1149.4033832579012 |
| 185.6 | 769.0811531202493  |
| 188.8 | 555.1771369730232  |

192.0 421.570738692521  
195.2 331.50000000627847  
198.4 269.02416969122737  
201.6 224.64022921354768  
204.8 191.82457718333836  
208.0 166.877908964911  
211.2 147.61657493136582  
214.4 132.62307094021753  
217.6 120.94479669024543  
220.8 111.95682678974829  
224.0 105.28341350502096  
227.2 100.72064386853782  
230.4 98.24502902700719  
233.6 98.0866560601063  
236.8 100.90421925654817  
240.0 108.20651498945927  
243.2 123.1905062147442  
246.4 153.59012891436288  
249.6 218.7695615015483  
252.8 348.66511712179647  
256.0 525.9131263964956  
259.2 612.819216095256  
262.4 510.8628774371462  
265.6 342.16047036306463  
268.8 232.18470143560538  
272.0 185.26484140519952  
275.2 172.375916258194  
278.4 177.7953011999528  
281.6 196.9944247190977  
284.8 231.3125966201763  
288.0 287.14573751113835  
291.2 378.02786533839213  
294.4 533.4590297296729  
297.6 827.0294708560132  
300.8 1441.6973769073052  
304.0 2698.730878240584  
307.2 4570.682759783968  
310.4 5731.739848421532  
313.6 4858.083163469908  
316.8 2983.4902662916857  
320.0 1595.2167612859603  
323.2 893.636525380446  
326.4 559.0492154701903

329.6 382.337189525182  
332.8 279.50895412144905  
336.0 215.38009173065512  
339.2 172.67975157059956  
342.4 142.85105982502762  
345.6 121.34625863206173  
348.8 105.51781063747123  
352.0 93.78601191562039  
355.2 85.63532591726616  
358.4 82.01403233484777  
361.6 82.31705333677596  
364.8 82.84096855013779  
368.0 82.95809362169558  
371.2 84.23291935194658  
374.4 87.5402234392055  
377.6 93.62572948029067  
380.8 103.84313977767962  
384.0 120.98205583082031  
387.2 151.35373552118222  
390.4 210.65042335564058  
393.6 335.5158282966288  
396.8 570.4322025782643  
400.0 847.8943077966848  
403.2 925.9417164346198  
406.4 715.2759287355304  
409.6 448.0370722339493  
412.8 288.6689575858518  
416.0 219.6083836342805  
419.2 195.29888605506466  
422.4 194.0317289762848  
425.6 209.12679039050272  
428.8 241.39686807786876  
432.0 298.51070418069435  
435.2 400.59560987857515  
438.4 598.962452851687  
441.6 1016.2173323455438  
444.8 1817.8248094360506  
448.0 2824.846397357641  
451.2 3205.8092814380943  
454.4 2540.8777828326374  
457.6 1600.484116649298  
460.8 1015.4674246647483  
464.0 780.9588715862897

467.2 787.2703949860907  
470.4 1046.5603340567957  
473.6 1641.1242996577994  
476.8 2371.70079213087  
480.0 2573.0556900346155  
483.2 2000.4022711182292  
486.4 1285.2583597035295  
489.6 875.2816921475338  
492.8 726.3169116083188  
496.0 723.0209851854044  
499.2 822.8934881393757  
502.4 1043.066539487625  
505.6 1468.0223869811093  
508.8 2328.6961709458947  
512.0 4178.471983248697  
515.2 7725.596164843489  
518.4 12037.748900498624  
521.6 13376.280790256804  
524.8 10116.120828937257  
528.0 5792.986998084937  
531.2 3090.5131120497854  
534.4 1790.64107275779  
537.6 1158.7633643782528  
540.8 815.6974892436251  
544.0 609.4322793071055  
547.2 475.858843766742  
550.4 384.5911710812132  
553.6 319.4121691581506  
556.8 270.97953651286923  
560.0 234.21272960746933  
563.2 206.61371033804926  
566.4 186.97049512474075  
569.6 173.4881532902112  
572.8 162.6962856928377  
576.0 152.60072918756828  
579.2 143.63085586207964  
582.4 134.05579884929068  
585.6 123.37654055134377  
588.8 114.50128858902642  
592.0 108.79943255169923  
595.2 105.52488105035474  
598.4 103.95461131406661  
601.6 103.82620484594247



|       |                    |
|-------|--------------------|
| 604.8 | 104.9770903269337  |
| 608.0 | 107.09384955449134 |
| 611.2 | 110.55324121822495 |
| 614.4 | 116.75680478125909 |
| 617.6 | 126.77281662859411 |
| 620.8 | 142.20463172488525 |
| 624.0 | 167.29591158709832 |
| 627.2 | 212.68083109900982 |
| 630.4 | 302.8163528919621  |
| 633.6 | 466.1563163886772  |
| 636.8 | 655.2506777473492  |
| 640.0 | 713.3260493987549  |
| 643.2 | 591.5612759689834  |
| 646.4 | 443.65519777582216 |
| 649.6 | 373.93006622631174 |
| 652.8 | 372.6501335389098  |
| 656.0 | 416.2998686417169  |
| 659.2 | 501.14619722297084 |
| 662.4 | 642.4080607041402  |
| 665.6 | 882.2624594346274  |
| 668.8 | 1318.2569166785884 |
| 672.0 | 2131.7917169848088 |
| 675.2 | 3547.436772436572  |
| 678.4 | 5857.4162853165335 |
| 681.6 | 9242.906566394242  |
| 684.8 | 12014.50138140326  |
| 688.0 | 11165.686775446724 |
| 691.2 | 7423.872802623173  |
| 694.4 | 4052.0603540719253 |
| 697.6 | 2209.841569764626  |
| 700.8 | 1335.7508711897708 |
| 704.0 | 892.0202407328503  |
| 707.2 | 639.7766937887768  |
| 710.4 | 482.7206389516339  |
| 713.6 | 378.2665603305461  |
| 716.8 | 305.36000302936577 |
| 720.0 | 252.6297727965625  |
| 723.2 | 213.52464145984067 |
| 726.4 | 184.11671915722383 |
| 729.6 | 162.05795441247196 |
| 732.8 | 146.13935745177864 |
| 736.0 | 136.34280614287934 |
| 739.2 | 134.66245577045862 |

742.4 146.5983973575213  
745.6 177.21981873207852  
748.8 212.69606314454353  
752.0 225.93401157658545  
755.2 230.64303155726247  
758.4 272.52759128015475  
761.6 335.7239374475047  
764.8 334.29388625410786  
768.0 248.69577624312348  
771.2 156.0557568038018  
774.4 100.88825116975687  
777.6 73.44907705598251  
780.8 58.941738796267806  
784.0 50.35980999074624  
787.2 44.9826376689842  
790.4 41.85268138689888  
793.6 41.04637260476011  
796.8 43.9056966308347  
800.0 53.05165511257998  
803.2 67.36854189352228  
806.4 74.4529276435625  
809.6 64.52813664031619  
812.8 48.32978223197016  
816.0 36.949233855795825  
819.2 29.85486489104615  
822.4 24.740003320299955  
825.6 21.201226331716505  
828.8 18.888179152279825  
832.0 17.23768578147627  
835.2 15.798693775802592  
838.4 14.386695904036358  
841.6 12.751369608153844  
844.8 9.556422867977092  
848.0 5.037738071936456  
851.2 2.3087276455410484  
854.4 1.5886691912216784  
857.6 1.4091175296766825  
860.8 1.2927250042918992  
864.0 1.1925977715396376  
867.2 1.1046744665691204  
870.4 1.026895918989752  
873.6 0.9576460098266619  
876.8 0.895637030750273

880.0 0.8398292501752598  
883.2 0.7893732596518621  
886.4 0.743567852589369  
889.6 0.7018287391621449  
892.8 0.6636649707768572  
896.0 0.6286608926029333  
899.2 0.5964492323342645  
902.4 0.5663246954011028  
905.6 0.5336738688179967  
908.8 0.48509654054819623  
912.0 0.4240396215122957  
915.2 0.3801502587209514  
918.4 0.3447410145001144  
921.6 0.27115972694860674  
924.8 0.17935074055691042  
928.0 0.32997593888887833  
931.2 1.4915980947755352  
934.4 4.382543578909776  
937.6 7.777832237051093  
940.8 9.72608850174877  
944.0 10.47224709800499  
947.2 10.95011307592143  
950.4 11.433656447158015  
953.6 11.949827325593525  
956.8 12.502299244460017  
960.0 13.092612352548482  
963.2 13.718842321582812  
966.4 14.386993345646292  
969.6 15.115623692472173  
972.8 15.911951011453057  
976.0 16.783882748482426  
979.2 17.762422885776587  
982.4 18.85274964901371  
985.6 20.008624115608463  
988.8 21.233737055272172  
992.0 22.564409104424634  
995.2 24.023409357275142  
998.4 25.628951268653623  
1001.6 27.401438434330466  
1004.8 29.36483588764429  
1008.0 31.54759432514335  
1011.2 33.98370367151477  
1014.4 36.71402620132112

1017.6 39.78802922222718  
1020.8 43.26605660255309  
1024.0 47.22233644991154  
1027.2 51.74900746629899  
1030.4 56.96158023645776  
1033.6 63.006451299498266  
1036.8 70.07140342164064  
1040.0 78.40053425917378  
1043.2 88.31589236375177  
1046.4 100.24951474960022  
1049.6 114.7920288370351  
1052.8 132.76843940430754  
1056.0 155.36009695931097  
1059.2 184.30831407091907  
1062.4 222.26973136628817  
1065.6 273.4814786097804  
1068.8 345.1664333023366  
1072.0 450.4116660265803  
1075.2 613.4952843581398  
1078.4 885.7027621175148  
1081.6 1391.783695454034  
1084.8 2422.888383969914  
1088.0 4421.148100053842  
1091.2 7329.715225896096  
1094.4 9725.775281474289  
1097.6 9616.2332572038  
1100.8 6950.710534785725  
1104.0 3991.994930087617  
1107.2 2163.9886240045416  
1110.4 1270.5912833952057  
1113.6 830.4614188691696  
1116.8 589.8110355884887  
1120.0 445.4764248339795  
1123.2 354.16555016332927  
1126.4 296.94236925420887  
1129.6 268.17656937001874  
1132.8 272.5496263537683  
1136.0 310.6929151907695  
1139.2 341.4805223258364  
1142.4 307.97598654978253  
1145.6 229.82038936892522  
1148.8 163.9115285797013  
1152.0 126.06513635325558

1155.2 105.3645362835091  
1158.4 92.78878663353402  
1161.6 84.38625878811848  
1164.8 78.5017589734667  
1168.0 74.37291374057622  
1171.2 71.65051847341796  
1174.4 70.18093689242926  
1177.6 69.79691982950234  
1180.8 70.3454101419785  
1184.0 71.88815559455993  
1187.2 74.61030381746525  
1190.4 78.73797580024303  
1193.6 84.5957211985385  
1196.8 92.67479415241527  
1200.0 103.72675067040979  
1203.2 118.93223653382361  
1206.4 140.21255970446765  
1209.6 170.7864293447098  
1212.8 216.42774687726148  
1216.0 288.5546739865662  
1219.2 412.09731733863634  
1222.4 647.7922476411652  
1225.6 1143.7163899431175  
1228.8 2133.022690762131  
1232.0 3498.507857908436  
1235.2 4182.244310904466  
1238.4 3386.869055295271  
1241.6 2035.8292154886433  
1244.8 1119.0467775696463  
1248.0 684.945339077513  
1251.2 513.00346850424  
1254.4 495.3747140699404  
1257.6 614.5589025158058  
1260.8 804.9933516129354  
1264.0 860.8321636581974  
1267.2 684.8380938270632  
1270.4 461.4944873272583  
1273.6 325.2021199745361  
1276.8 246.56669102606241  
1280.0 188.35576298626006  
1283.2 148.32277939803726  
1286.4 125.30517389731838  
1289.6 112.72521583149

1292.8 105.84861134560315  
1296.0 102.45719298700868  
1299.2 101.56309914418148  
1302.4 102.79222398229571  
1305.6 106.1775618942022  
1308.8 112.03702085884782  
1312.0 121.13345813221659  
1315.2 135.1409043151562  
1318.4 157.7852181828507  
1321.6 198.04735630352124  
1324.8 277.17238048219303  
1328.0 428.640670700303  
1331.2 645.6829331611438  
1334.4 799.781695247754  
1337.6 748.5703324208497  
1340.8 559.7942301612666  
1344.0 403.9206137776129  
1347.2 331.60853247894715  
1350.4 312.80797216088774  
1353.6 323.85635456225646  
1356.8 357.61268831043884  
1360.0 418.80485492247834  
1363.2 519.9139575183303  
1366.4 659.5656131383455  
1369.6 800.7526542217087  
1372.8 935.8816697072899  
1376.0 1163.1536503288514  
1379.2 1655.53297948573  
1382.4 2725.470879938627  
1385.6 4828.587155340265  
1388.8 7646.959183752354  
1392.0 9012.991370233605  
1395.2 7504.827667094477  
1398.4 5150.227310069053  
1401.6 4007.768846993002  
1404.8 4465.684205789263  
1408.0 6605.322675898908  
1411.2 9941.37016570364  
1414.4 12631.943143757686  
1417.6 13858.638210803647  
1420.8 14212.093627824866  
1424.0 12370.121793353614  
1427.2 8345.958773054188

1430.4 4758.863412815993  
1433.6 2754.109983936537  
1436.8 1781.450228399602  
1440.0 1278.9336641383907  
1443.2 991.1190309718328  
1446.4 813.7144667921569  
1449.6 700.2339637887117  
1452.8 627.7535702471527  
1456.0 584.2586782387103  
1459.2 563.4867531030445  
1462.4 562.6981602820426  
1465.6 581.7984733020396  
1468.8 623.2767532616299  
1472.0 692.9080863718261  
1475.2 801.5899454741343  
1478.4 969.4331489352292  
1481.6 1235.163896761038  
1484.8 1679.791839703016  
1488.0 2492.0925038925825  
1491.2 4138.903816845203  
1494.4 7562.8488700598755  
1497.6 13356.00858111887  
1500.8 18902.383816308  
1504.0 19116.254405763568  
1507.2 13800.839222638158  
1510.4 7930.029961975088  
1513.6 4357.211120497734  
1516.8 2638.295204120439  
1520.0 1821.0708048475487  
1523.2 1420.6833125595135  
1526.4 1267.7092102185914  
1529.6 1357.0867065325247  
1532.8 1818.106698359407  
1536.0 2745.3787721311437  
1539.2 3607.85424355716  
1542.4 3449.4956323616443  
1545.6 2392.1790064555184  
1548.8 1392.6491534182044  
1552.0 831.1465170031755  
1555.2 556.3771320778861  
1558.4 411.0992020287176  
1561.6 323.96828865206965  
1564.8 266.2098461681858

1568.0 224.81395017864793  
1571.2 192.45894720027417  
1574.4 165.87628722732248  
1577.6 144.8483073855937  
1580.8 126.98922842882658  
1584.0 110.73520737903429  
1587.2 98.06085156387877  
1590.4 88.75493158758354  
1593.6 81.48306648777526  
1596.8 76.94687007555817

#### D. Cu-inside:

# X-Axis: Frequency (cm-1)  
# Y-Axis: Intensity (Arbitrary)

| #    | X                  | Y |
|------|--------------------|---|
| 0.0  | 1.5773776696747517 |   |
| 3.2  | 1.6645249683985957 |   |
| 6.4  | 1.8480930496180672 |   |
| 9.6  | 2.1489520725369964 |   |
| 12.8 | 2.594674986036312  |   |
| 16.0 | 3.2231446280195937 |   |
| 19.2 | 4.083246963363809  |   |
| 22.4 | 5.232986323529735  |   |
| 25.6 | 6.7363012538555465 |   |
| 28.8 | 8.657865792942282  |   |
| 32.0 | 11.055542261525936 |   |
| 35.2 | 13.970624226395927 |   |
| 38.4 | 17.416717675721753 |   |
| 41.6 | 21.36855166200645  |   |
| 44.8 | 25.752660658428297 |   |
| 48.0 | 30.44214132776084  |   |
| 51.2 | 35.25744428173922  |   |
| 54.4 | 39.97459613222937  |   |
| 57.6 | 44.34109039939601  |   |
| 60.8 | 48.09827340761807  |   |
| 64.0 | 51.00764277852936  |   |
| 67.2 | 52.87740025425917  |   |
| 70.4 | 53.58503553961836  |   |
| 73.6 | 53.09237673617683  |   |
| 76.8 | 51.45038844375352  |   |
| 80.0 | 48.792897779647525 |   |



|       |                    |
|-------|--------------------|
| 83.2  | 45.32043266169629  |
| 86.4  | 41.276866166748896 |
| 89.6  | 36.922767658933026 |
| 92.8  | 32.50954171404437  |
| 96.0  | 28.25797921629487  |
| 99.2  | 24.34359172448145  |
| 102.4 | 20.889731367647297 |
| 105.6 | 17.968102156054616 |
| 108.8 | 15.605271806921047 |
| 112.0 | 13.793410192875594 |
| 115.2 | 12.503874912497032 |
| 118.4 | 11.698715563932256 |
| 121.6 | 11.333778410228305 |
| 124.8 | 11.383243295860504 |
| 128.0 | 11.846152715548305 |
| 131.2 | 12.73490697827352  |
| 134.4 | 14.10039555499435  |
| 137.6 | 16.04022461060789  |
| 140.8 | 18.699114387449292 |
| 144.0 | 22.274884178215352 |
| 147.2 | 27.021708391267463 |
| 150.4 | 33.24933571690262  |
| 153.6 | 41.31528929534317  |
| 156.8 | 51.60070209467613  |
| 160.0 | 64.48396168531961  |
| 163.2 | 80.29920300893755  |
| 166.4 | 99.28102637846048  |
| 169.6 | 121.51508007460683 |
| 172.8 | 146.8746255118027  |
| 176.0 | 174.96880376665803 |
| 179.2 | 205.13945336680518 |
| 182.4 | 236.4878932286907  |
| 185.6 | 267.92175877138425 |
| 188.8 | 298.25335174437475 |
| 192.0 | 326.33169940341344 |
| 195.2 | 351.19131752296494 |
| 198.4 | 372.19592392491995 |
| 201.6 | 389.15189472003897 |
| 204.8 | 402.36737246801766 |
| 208.0 | 412.6391356045821  |
| 211.2 | 421.15999346381295 |
| 214.4 | 429.3530602747196  |
| 217.6 | 438.6523491679604  |

|       |                    |
|-------|--------------------|
| 220.8 | 450.2645394346654  |
| 224.0 | 464.95283802472903 |
| 227.2 | 482.84426188626657 |
| 230.4 | 503.37067817576684 |
| 233.6 | 525.3285857950425  |
| 236.8 | 547.0003381893665  |
| 240.0 | 566.3981712071718  |
| 243.2 | 581.5888453665162  |
| 246.4 | 591.003455299208   |
| 249.6 | 593.7096514319023  |
| 252.8 | 589.6148027755082  |
| 256.0 | 579.5509367972688  |
| 259.2 | 565.217223661271   |
| 262.4 | 549.0011063807984  |
| 265.6 | 533.69878362067    |
| 268.8 | 522.176362268935   |
| 272.0 | 517.0125201425212  |
| 275.2 | 520.1430618216007  |
| 278.4 | 532.6546373986096  |
| 281.6 | 554.6267728250448  |
| 284.8 | 585.1118828252502  |
| 288.0 | 622.2558597095339  |
| 291.2 | 663.4965658578859  |
| 294.4 | 705.877864448098   |
| 297.6 | 746.418332703417   |
| 300.8 | 782.4419513773423  |
| 304.0 | 811.8557299363229  |
| 307.2 | 833.4298235225396  |
| 310.4 | 846.9144520824873  |
| 313.6 | 853.0237269253789  |
| 316.8 | 853.3122895929527  |
| 320.0 | 849.9645778416382  |
| 323.2 | 845.528179995573   |
| 326.4 | 842.6260822290211  |
| 329.6 | 843.7108499775093  |
| 332.8 | 850.8330978476366  |
| 336.0 | 865.4900857443125  |
| 339.2 | 888.5848423107547  |
| 342.4 | 920.4021985872376  |
| 345.6 | 960.617839276503   |
| 348.8 | 1008.3219378535248 |
| 352.0 | 1062.0453271860547 |
| 355.2 | 1119.7883778615878 |

358.4 1179.0660544185205  
361.6 1236.9992924102328  
364.8 1290.4593813046947  
368.0 1336.2775769143732  
371.2 1371.506720195351  
374.4 1393.7014812165853  
377.6 1401.1665882597094  
380.8 1393.1259067314747  
384.0 1369.8012257282232  
387.2 1332.3094285611214  
390.4 1282.4650590948202  
393.6 1222.5483136627938  
396.8 1155.0062481604045  
400.0 1082.1846026195326  
403.2 1006.1679416687086  
406.4 928.701725966903  
409.6 851.1842633787901  
412.8 774.7402352343385  
416.0 700.3223891105114  
419.2 628.7939714096944  
422.4 560.9788562478584  
425.6 497.6639101808482  
428.8 439.5731417389911  
432.0 387.33047608846766  
435.2 341.35809663399607  
438.4 301.8540299166124  
441.6 268.7895593904321  
444.8 241.92392166852377  
448.0 220.84368114578484  
451.2 205.02411675729618  
454.4 193.89479612976444  
457.6 186.90294261807404  
460.8 183.55224041016024  
464.0 183.4342086585977  
467.2 186.2480183813204  
470.4 191.82381803960655  
473.6 200.1311560549907  
476.8 211.27179304443214  
480.0 225.44387672063877  
483.2 242.96216839107473  
486.4 264.24476912692035  
489.6 289.79284733646017  
492.8 320.130249359004

496.0 355.71845489197665  
499.2 396.90499450448914  
502.4 443.8231125182601  
505.6 496.28524071135104  
508.8 553.6892119054822  
512.0 614.9538975585666  
515.2 678.5002130935824  
518.4 742.2841750257062  
521.6 803.8985491701593  
524.8 860.7284476652086  
528.0 910.1465122832913  
531.2 949.7249329103715  
534.4 977.4375274839423  
537.6 991.8242892203162  
540.8 992.0970023633441  
544.0 978.1853225872815  
547.2 950.7121592909698  
550.4 910.9154400314472  
553.6 860.5306313273774  
556.8 801.6486424353299  
560.0 736.5666810699573  
563.2 667.6412000150344  
566.4 597.1601506344801  
569.6 527.231545355241  
572.8 459.6978089059907  
576.0 396.078345116381  
579.2 337.5371162230581  
582.4 284.8787614887181  
585.6 238.56316954750926  
588.8 198.74483823282043  
592.0 165.32442993436058  
595.2 138.00392232146118  
598.4 116.3428975180744  
601.6 99.80602357747703  
604.8 87.80576919083828  
608.0 79.72934472979077  
611.2 74.95822265804286  
614.4 72.89133947256302  
617.6 72.9487997373616  
620.8 74.53298180957354  
624.0 77.0940487684756  
627.2 80.14446672181786  
630.4 83.25443394184826

|       |                    |
|-------|--------------------|
| 633.6 | 86.11053344470743  |
| 636.8 | 88.55810389022461  |
| 640.0 | 90.58391475438289  |
| 643.2 | 92.34799457051629  |
| 646.4 | 94.20351430066306  |
| 649.6 | 96.6783131327372   |
| 652.8 | 100.44267881356909 |
| 656.0 | 106.25402360484166 |
| 659.2 | 114.91713962679427 |
| 662.4 | 127.20938572748473 |
| 665.6 | 143.80299223733195 |
| 668.8 | 165.1912807441796  |
| 672.0 | 191.6194761822726  |
| 675.2 | 223.028198754278   |
| 678.4 | 259.02554826793613 |
| 681.6 | 298.8877321715436  |
| 684.8 | 341.588967019126   |
| 688.0 | 385.86376484149486 |
| 691.2 | 430.29580635709453 |
| 694.4 | 473.4216127577182  |
| 697.6 | 513.8345194946137  |
| 700.8 | 550.2746407088612  |
| 704.0 | 581.6932192553397  |
| 707.2 | 607.2852502023406  |
| 710.4 | 626.4912127145718  |
| 713.6 | 638.9751066477667  |
| 716.8 | 644.5902634120669  |
| 720.0 | 643.3474354886685  |
| 723.2 | 635.3885437676308  |
| 726.4 | 620.9725090859378  |
| 729.6 | 600.4815686735172  |
| 732.8 | 574.4296297616911  |
| 736.0 | 543.4686584113788  |
| 739.2 | 508.38629778119696 |
| 742.4 | 470.0890553236154  |
| 745.6 | 429.57047798989936 |
| 748.8 | 387.8668231668017  |
| 752.0 | 346.0061108912042  |
| 755.2 | 304.95704780885535 |
| 758.4 | 265.58370190755556 |
| 761.6 | 228.61023387043917 |
| 764.8 | 194.5978413877142  |
| 768.0 | 163.93432553057994 |

|       |                    |
|-------|--------------------|
| 771.2 | 136.8351784684213  |
| 774.4 | 113.35650174972903 |
| 777.6 | 93.41589613565131  |
| 780.8 | 76.80876781540009  |
| 784.0 | 63.2424807454544   |
| 787.2 | 52.37689758193538  |
| 790.4 | 43.824775869181536 |
| 793.6 | 37.19121504309504  |
| 796.8 | 32.101157777870554 |
| 800.0 | 28.209392623306904 |
| 803.2 | 25.211771525856992 |
| 806.4 | 22.854846269947803 |
| 809.6 | 20.93959034081134  |
| 812.8 | 19.321016713518613 |
| 816.0 | 17.885828903191733 |
| 819.2 | 16.561246424852428 |
| 822.4 | 15.30902094293777  |
| 825.6 | 14.114386006831475 |
| 828.8 | 12.978831547759485 |
| 832.0 | 11.914380006977806 |
| 835.2 | 10.934242041975397 |
| 838.4 | 10.048662689341553 |
| 841.6 | 9.265204903140747  |
| 844.8 | 8.588046564370012  |
| 848.0 | 8.017304943670673  |
| 851.2 | 7.549409694848754  |
| 854.4 | 7.178262591547     |
| 857.6 | 6.896494964211971  |
| 860.8 | 6.696573537557944  |
| 864.0 | 6.5716949816800305 |
| 867.2 | 6.516434196415498  |
| 870.4 | 6.527183351545756  |
| 873.6 | 6.602468498350435  |
| 876.8 | 6.74326970550622   |
| 880.0 | 6.953539548992314  |
| 883.2 | 7.241309832372396  |
| 886.4 | 7.6215049280142955 |
| 889.6 | 8.12204934153193   |
| 892.8 | 8.778638819586897  |
| 896.0 | 9.620985550134767  |
| 899.2 | 10.714930129645255 |
| 902.4 | 12.155089453223532 |
| 905.6 | 14.070500752862491 |

908.8 16.63528468460589  
912.0 20.078634133578866  
915.2 24.693036571194217  
918.4 30.838543958780203  
921.6 38.92998115477589  
924.8 49.41933468102785  
928.0 62.77405158081906  
931.2 79.4226699845571  
934.4 99.69239260285313  
937.6 123.73820942918913  
940.8 151.47192001337658  
944.0 182.50343289798266  
947.2 216.10801477393335  
950.4 251.23196345464305  
953.6 286.54514768706093  
956.8 320.534675092368  
960.0 351.62874327538213  
963.2 378.3686431837774  
966.4 399.5512883362775  
969.6 414.3557033619755  
972.8 422.4294984925348  
976.0 423.90238438231455  
979.2 419.3636764146327  
982.4 409.7824945544589  
985.6 396.3964036529404  
988.8 380.59062301409347  
992.0 363.78243843067634  
995.2 347.326224520559  
998.4 332.4398878877263  
1001.6 320.14585476319627  
1004.8 311.23276016138055  
1008.0 306.22140291876184  
1011.2 305.3349734317913  
1014.4 308.4778928625628  
1017.6 315.22827984700393  
1020.8 324.85205409378614  
1024.0 336.345251486208  
1027.2 348.50677279723726  
1030.4 360.0377306653958  
1033.6 369.6575701185832  
1036.8 376.2228528054788  
1040.0 378.83102222387265  
1043.2 376.89334752092697

1046.4 370.17886098793923  
1049.6 358.819131224293  
1052.8 343.27299720618925  
1056.0 324.2252385178396  
1059.2 302.5289104163437  
1062.4 279.1177537415462  
1065.6 254.9224733644606  
1068.8 230.80572473765352  
1072.0 207.5180414242862  
1075.2 185.67322779522246  
1078.4 165.74163382182385  
1081.6 148.05340129712147  
1084.8 132.8001949654415  
1088.0 120.05632398228971  
1091.2 109.7882331422454  
1094.4 101.86271829711649  
1097.6 96.06920400292412  
1100.8 92.13673500571596  
1104.0 89.75623331380179  
1107.2 88.61085239803478  
1110.4 88.4083655649379  
1113.6 88.91330043326431  
1116.8 89.9722828032949  
1120.0 91.50576219234158  
1123.2 93.5268421723897  
1126.4 96.11677063991856  
1129.6 99.39300119873084  
1132.8 103.4880921136057  
1136.0 108.49956662369497  
1139.2 114.46426167035379  
1142.4 121.34254589064514  
1145.6 129.0143588679079  
1148.8 137.29006112095308  
1152.0 145.92602909098926  
1155.2 154.6567393736383  
1158.4 163.231718836302  
1161.6 171.4335021250176  
1164.8 179.09960466055122  
1168.0 186.12575714338584  
1171.2 192.46391369547482  
1174.4 198.11885227288371  
1177.6 203.12928833166885  
1180.8 207.55561888621293



1184.0 211.47280200501336  
1187.2 214.9684316849845  
1190.4 218.15002644184509  
1193.6 221.15027585890044  
1196.8 224.13123917415083  
1200.0 227.2868565730586  
1203.2 230.82414403621766  
1206.4 234.9398892460372  
1209.6 239.78608180259292  
1212.8 245.4323507185467  
1216.0 251.83369940092976  
1219.2 258.8108572208359  
1222.4 266.0496577612114  
1225.6 273.12446460833667  
1228.8 279.5445547623241  
1232.0 284.81035071847776  
1235.2 288.4782082573871  
1238.4 290.2122149879738  
1241.6 289.82932317666575  
1244.8 287.3224744556117  
1248.0 282.8370259837854  
1251.2 276.66561629922114  
1254.4 269.21490715452484  
1257.6 260.9625020897645  
1260.8 252.41352769121795  
1264.0 244.07960355801117  
1267.2 236.47311485054632  
1270.4 230.10106028207093  
1273.6 225.4718097484747  
1276.8 223.1035954224349  
1280.0 223.50798058967467  
1283.2 227.1717361188349  
1286.4 234.54727871179605  
1289.6 245.9926540913838  
1292.8 261.71897341741584  
1296.0 281.73256055722504  
1299.2 305.7845776219316  
1302.4 333.3391036648978  
1305.6 363.5696701439532  
1308.8 395.3921417280147  
1312.0 427.5219111852449  
1315.2 458.5677319890561  
1318.4 487.14972258137794

1321.6 512.0078572254915  
1324.8 532.103236005009  
1328.0 546.6816429008902  
1331.2 555.2983922462079  
1334.4 557.8153394348856  
1337.6 554.3568045083607  
1340.8 545.2489783033873  
1344.0 530.9562300108861  
1347.2 512.0245499997769  
1350.4 489.0514945888923  
1353.6 462.67280557072115  
1356.8 433.55925152851546  
1360.0 402.424050732443  
1363.2 370.02520719446153  
1366.4 337.1526992619874  
1369.6 304.5995972724311  
1372.8 273.1219249645343  
1376.0 243.39453335608482  
1379.2 215.9714852025212  
1382.4 191.25011299835856  
1385.6 169.45858360293357  
1388.8 150.6718086331232  
1392.0 134.82851763338837  
1395.2 121.76415397365118  
1398.4 111.2474034197215  
1401.6 103.01008683409576  
1404.8 96.80047308284425  
1408.0 92.38580816277575  
1411.2 89.5699603762259  
1414.4 88.21978047836345  
1417.6 88.27387647125968  
1420.8 89.72019774510963  
1424.0 92.5811520005531  
1427.2 96.91277630510353  
1430.4 102.77035923383526  
1433.6 110.17800608167931  
1436.8 119.10804272908209  
1440.0 129.46026280900554  
1443.2 141.0304265412366  
1446.4 153.53111328310564  
1449.6 166.60583101315834  
1452.8 179.85154163691408  
1456.0 192.84804756698816

1459.2 205.18720217670625  
1462.4 216.49603085510265  
1465.6 226.45004511780218  
1468.8 234.77728689414386  
1472.0 241.24928951529392  
1475.2 245.66906825910758  
1478.4 247.86277721502904  
1481.6 247.67534962212443  
1484.8 244.97612524823876  
1488.0 239.67506626330882  
1491.2 231.74708419470304  
1494.4 221.25861336310498  
1497.6 208.38886928434226  
1500.8 193.4416502437821  
1504.0 176.84130228216117  
1507.2 159.1088553586025  
1510.4 140.82546605678536  
1513.6 122.58679152281874  
1516.8 104.95410776519617  
1520.0 88.41050579897896  
1523.2 73.3285176673121  
1526.4 59.95281889559242  
1529.6 48.398638342861574  
1532.8 38.66382426015073  
1536.0 30.65088630344454  
1539.2 24.198303482333294  
1542.4 19.10435345591494  
1545.6 15.147972388785432  
1548.8 12.115202692874005  
1552.0 9.81153653646881  
1555.2 8.069584818824685  
1558.4 6.755633224663285  
1561.6 5.759794374980311  
1564.8 4.996738785029057  
1568.0 4.404084632544193  
1571.2 3.9367206389549865  
1574.4 3.5621537181242564  
1577.6 3.262226997413352  
1580.8 3.0256911385010077  
1584.0 2.839009819943845  
1587.2 2.6946704268615496  
1590.4 2.588738198241851  
1593.6 2.519052844211506

1596.8 2.4844678444189325

**E. Plain:**

# X-Axis: Frequency (cm-1)  
# Y-Axis: Intensity (Arbitrary)

| #     | X                  | Y |
|-------|--------------------|---|
| 200.0 | 17.053974222746426 |   |
| 203.2 | 18.21390346355623  |   |
| 206.4 | 20.072874231639915 |   |
| 209.6 | 22.349093396170577 |   |
| 212.8 | 25.04557918537293  |   |
| 216.0 | 28.262509762986888 |   |
| 219.2 | 32.14297372189461  |   |
| 222.4 | 36.883332743394824 |   |
| 225.6 | 42.75857379962076  |   |
| 228.8 | 50.16348633399997  |   |
| 232.0 | 59.68148729033118  |   |
| 235.2 | 72.20463730406479  |   |
| 238.4 | 89.15371495345897  |   |
| 241.6 | 112.90699398553868 |   |
| 244.8 | 147.70018102418788 |   |
| 248.0 | 201.69821846959962 |   |
| 251.2 | 292.3250590571219  |   |
| 254.4 | 461.2853201776755  |   |
| 257.6 | 812.1633148141062  |   |
| 260.8 | 1534.4978525063357 |   |
| 264.0 | 2641.132363603743  |   |
| 267.2 | 3383.5544573865973 |   |
| 270.4 | 2930.2575332250094 |   |
| 273.6 | 1823.3209193516918 |   |
| 276.8 | 971.617560260274   |   |
| 280.0 | 535.8682500925458  |   |
| 283.2 | 329.68028025972706 |   |
| 286.4 | 222.7289517138105  |   |
| 289.6 | 160.71242965159303 |   |
| 292.8 | 121.53921349312968 |   |
| 296.0 | 95.19143585307944  |   |
| 299.2 | 76.60755408442171  |   |
| 302.4 | 63.00337769368544  |   |
| 305.6 | 52.742453737889875 |   |

|       |                    |
|-------|--------------------|
| 308.8 | 44.81074474862612  |
| 312.0 | 38.55224246046112  |
| 315.2 | 33.52708981257045  |
| 318.4 | 29.43157120654746  |
| 321.6 | 26.05837926725401  |
| 324.8 | 23.341398162608094 |
| 328.0 | 21.443983696990436 |
| 331.2 | 20.23317886148792  |
| 334.4 | 19.033043387433686 |
| 337.6 | 17.719822572151077 |
| 340.8 | 16.514252059437688 |
| 344.0 | 15.470913448451782 |
| 347.2 | 14.572683123144046 |
| 350.4 | 13.799762124325651 |
| 353.6 | 13.136040107365265 |
| 356.8 | 12.56855736973872  |
| 360.0 | 12.086910816890096 |
| 363.2 | 11.682809214798311 |
| 366.4 | 11.349742661599919 |
| 369.6 | 11.082742255931304 |
| 372.8 | 10.878214324404182 |
| 376.0 | 10.733839897478962 |
| 379.2 | 10.648535927122026 |
| 382.4 | 10.622480887647692 |
| 385.6 | 10.657214786197653 |
| 388.8 | 10.755833935788367 |
| 392.0 | 10.923316865992476 |
| 395.2 | 11.16704453821242  |
| 398.4 | 11.497625494806048 |
| 401.6 | 11.930225007330467 |
| 404.8 | 12.486770875489713 |
| 408.0 | 13.199769055117912 |
| 411.2 | 14.119261108941688 |
| 414.4 | 15.326363012363363 |
| 417.6 | 16.961429975833457 |
| 420.8 | 19.27950997009404  |
| 424.0 | 22.719576198744285 |
| 427.2 | 28.251331944890737 |
| 430.4 | 39.253982745147894 |
| 433.6 | 61.796047527424044 |
| 436.8 | 93.597682301203    |
| 440.0 | 111.25228192877819 |
| 443.2 | 96.74498340398671  |

446.4 69.97586179542435  
449.6 53.21687258182429  
452.8 48.08248961618635  
456.0 49.85197583068678  
459.2 56.09799991189159  
462.4 66.60333248765384  
465.6 82.5974051134694  
468.8 106.98398760395841  
472.0 145.77930292234709  
475.2 212.2339638746342  
478.4 338.6450503007094  
481.6 604.2120344538183  
484.8 1138.7624136386135  
488.0 1897.171725659599  
491.2 2308.138304353865  
494.4 1892.9638266262414  
497.6 1134.360353433646  
500.8 601.3812421404525  
504.0 336.7293203467299  
507.2 210.5214355568092  
510.4 143.90276560875745  
513.6 104.70857128823317  
516.8 79.68347496992894  
520.0 62.713387916149195  
523.2 50.66619641821707  
526.4 41.800317250418914  
529.6 35.0832916963864  
532.8 29.870876340405427  
536.0 25.74386991051617  
539.2 22.41980848928439  
542.4 19.702649682407017  
545.6 17.45283841681764  
548.8 15.568857759054875  
552.0 13.975770948403138  
555.2 12.618152561528465  
558.4 11.453084122959389  
561.6 10.444184130675609  
564.8 9.563106306504237  
568.0 8.790233599146129  
571.2 8.110736988138232  
574.4 7.511293513382032  
577.6 6.978305274189388  
580.8 6.4999164923603505

584.0 6.0659073448080765  
587.2 5.667161322879226  
590.4 5.302737863890414  
593.6 4.971653294265783  
596.8 4.662615141985598  
600.0 4.3683024788076565  
603.2 4.101089513766701  
606.4 3.86904797527248  
609.6 3.6649752461363487  
612.8 3.4939730916314717  
616.0 3.395195929345039  
619.2 3.360121010999488  
622.4 3.2948231582638186  
625.6 3.1872231089630008  
628.8 3.0760839317252238  
632.0 2.973751567092043  
635.2 2.8808013859856736  
638.4 2.796479247585218  
641.6 2.712097549234115  
644.8 2.537775338929869  
648.0 2.0022026397297044  
651.2 1.1810598320272758  
654.4 0.7087693048377551  
657.6 0.633221979532899  
660.8 0.6644197445396023  
664.0 0.7090671648641451  
667.2 0.7593716913446302  
670.4 0.816116842451925  
673.6 0.8806883770553022  
676.8 0.954941164753023  
680.0 1.041428792482995  
683.2 1.1437866260134437  
686.4 1.2673989666206416  
689.6 1.4206284449183635  
692.8 1.6172381414707313  
696.0 1.8815648060961518  
699.2 2.26072721459451  
702.4 2.8569223806732342  
705.6 3.9183670338403473  
708.8 6.036997551596256  
712.0 10.069444593293436  
715.2 15.354754910400004  
718.4 17.829743704902626

721.6 14.871571542707747  
724.8 10.08296577171915  
728.0 7.022285921510768  
731.2 5.803786543640809  
734.4 5.600674061509318  
737.6 5.9446109694898155  
740.8 6.615812647884318  
744.0 7.53966492997894  
747.2 8.846359631673714  
750.4 10.78556897497424  
753.6 13.694511129007173  
756.8 18.17843835635518  
760.0 25.505093007255894  
763.2 38.60236869746629  
766.4 64.80904897508753  
769.6 120.4510815734787  
772.8 220.42053743298732  
776.0 322.67667442042966  
779.2 328.8722498594665  
782.4 231.37353708664182  
785.6 127.77131054933557  
788.8 68.29768564924437  
792.0 40.18643024156796  
795.2 26.251921204272705  
798.4 18.506988616902085  
801.6 13.764900857365923  
804.8 10.647887315701801  
808.0 8.487725921757255  
811.2 6.927507516943539  
814.4 5.762343874260955  
817.6 4.869033436295105  
820.8 4.169588128553231  
824.0 3.611544219116234  
827.2 3.158584942647897  
830.4 2.785752727785299  
833.6 2.475448118681086  
836.8 2.214527627664893  
840.0 1.9929954299696135  
843.2 1.8032565143512  
846.4 1.6394793585495782  
849.6 1.4971197430717644  
852.8 1.3725899009687614  
856.0 1.2630250797204687



859.2 1.1661148144671039  
862.4 1.0799787157075356  
865.6 1.0030725981718442  
868.8 0.9340860765616894  
872.0 0.8715695888560335  
875.2 0.8132909228091872  
878.4 0.7580935190749252  
881.6 0.7081268394567914  
884.8 0.6647143172337766  
888.0 0.6263339839439794  
891.2 0.5914391184580214  
894.4 0.5594002962301813  
897.6 0.5298815626382272  
900.8 0.5025931427803232  
904.0 0.4773229572373557  
907.2 0.45394157524548107  
910.4 0.4322746064445995  
913.6 0.4121328717813175  
916.8 0.39336769544468325  
920.0 0.3758556890024234  
923.2 0.35948786726165183  
926.4 0.34412774549677927  
929.6 0.32847662942633815  
932.8 0.2993880014936327  
936.0 0.2190739741098362  
939.2 0.12083957708291909  
942.4 0.16650874143838065  
945.6 0.35178983232595823  
948.8 0.48381576389025704  
952.0 0.5309625828638258  
955.2 0.5563369328065713  
958.4 0.5812515672188441  
961.6 0.6078067286488898  
964.8 0.6362247918038282  
968.0 0.6666840000314811  
971.2 0.6993840499895333  
974.4 0.7345504800604543  
977.6 0.7724390743747473  
980.8 0.8133383953383349  
984.0 0.8575754353892017  
987.2 0.9055235101731005  
990.4 0.9576102342519957  
993.6 1.0143261427752752

996.8 1.0762364556756179  
1000.0 1.1439956276858791  
1003.2 1.2183646673916855  
1006.4 1.3002325822440024  
1009.6 1.3906431152477357  
1012.8 1.4908282454509854  
1016.0 1.602250473858176  
1019.2 1.7266566275057804  
1022.4 1.8661469179434376  
1025.6 2.0232644089853054  
1028.8 2.201112092890912  
1032.0 2.403507773225617  
1035.2 2.635191392786898  
1038.4 2.9021061534126433  
1041.6 3.211785086948499  
1044.8 3.573890898826098  
1048.0 4.000982805620207  
1051.2 4.509626587385188  
1054.4 5.122035719998838  
1057.6 5.868555858382864  
1060.8 6.791528345043749  
1064.0 7.951485206331247  
1067.2 9.437440272887098  
1070.4 11.384705650888982  
1073.6 14.007282061031209  
1076.8 17.66031173761482  
1080.0 22.969486000792926  
1083.2 31.124252300870765  
1086.4 44.61823849672187  
1089.6 69.31590884568784  
1092.8 119.8846046666236  
1096.0 225.82302750060873  
1099.2 400.2281217224721  
1102.4 541.5072173388644  
1105.6 499.5632236241198  
1108.8 325.59457766072444  
1112.0 175.4594220368831  
1115.2 95.68879528036828  
1118.4 58.158191994583106  
1121.6 39.02614557240564  
1124.8 28.11036008374417  
1128.0 21.307899976118197  
1131.2 16.784460495491643

1134.4 13.626901108010383  
1137.6 11.339105854373706  
1140.8 9.63237183377694  
1144.0 8.329299059781643  
1147.2 7.3159712691379575  
1150.4 6.51653908425936  
1153.6 5.878970357030559  
1156.8 5.366670048087691  
1160.0 4.953360869376107  
1163.2 4.619860482522824  
1166.4 4.351992240325167  
1169.6 4.139198376294764  
1172.8 3.9736024546341016  
1176.0 3.8493671748806686  
1179.2 3.7622519484867345  
1182.4 3.709309915739768  
1185.6 3.688686067567119  
1188.8 3.69949235220513  
1192.0 3.7417453146436914  
1195.2 3.816359486542673  
1198.4 3.9251962845336204  
1201.6 4.0711718808326385  
1204.8 4.25843086907902  
1208.0 4.492611345143468  
1211.2 4.781238232568996  
1214.4 5.134278475683237  
1217.6 5.564938419469133  
1220.8 6.090827035450365  
1224.0 6.735674366908973  
1227.2 7.531921483755521  
1230.4 8.524719760245514  
1233.6 9.778285462401616  
1236.8 11.386339211842284  
1240.0 13.489939742035709  
1243.2 16.309391669283766  
1246.4 20.20459166283855  
1249.6 25.797149581474322  
1252.8 34.23905830829447  
1256.0 47.866571780667556  
1259.2 71.96852662326995  
1262.4 119.69337681999014  
1265.6 220.7278048461244  
1268.8 405.3526989139385

1272.0 606.5458297326368  
1275.2 640.6036749877237  
1278.4 467.1407761506322  
1281.6 263.445850203448  
1284.8 140.4694789038471  
1288.0 81.55630033371831  
1291.2 52.66625199311391  
1294.4 36.83020484654402  
1297.6 27.236777913607344  
1300.8 20.982590236938414  
1304.0 16.680741650474097  
1307.2 13.605689986314504  
1310.4 11.335351145992416  
1313.6 9.592798713485598  
1316.8 8.220248136798144  
1320.0 7.126338056579673  
1323.2 6.242765318671886  
1326.4 5.519174708466976  
1329.6 4.919411492269497  
1332.8 4.417090466377739  
1336.0 3.992574768118268  
1339.2 3.631005026084968  
1342.4 3.3209805251978337  
1345.6 3.0536630360933525  
1348.8 2.822180688423345  
1352.0 2.6212866974205564  
1355.2 2.447167511227571  
1358.4 2.2965740746993335  
1361.6 2.164767518111997  
1364.8 2.054434602304106  
1368.0 2.055991984874032  
1371.2 2.4540376481971435  
1374.4 3.202032824488471  
1377.6 3.681021152518097  
1380.8 3.8164718351861873  
1384.0 3.8721087407367634  
1387.2 3.935220085056671  
1390.4 4.014233108468545  
1393.6 4.11008206186385  
1396.8 4.223749129487983  
1400.0 4.356559932917872  
1403.2 4.510241318272432  
1406.4 4.687004945833519

1409.6 4.889665556598439  
1412.8 5.121808206301031  
1416.0 5.388027083506222  
1419.2 5.694271919225952  
1422.4 6.048286289552263  
1425.6 6.458196383970866  
1428.8 6.91289948393452  
1432.0 7.355546218109386  
1435.2 7.837149496487612  
1438.4 8.582811834535782  
1441.6 9.67753212217929  
1444.8 11.163919551258513  
1448.0 13.285952723592416  
1451.2 16.63885997878033  
1454.4 22.181977216260954  
1457.6 32.01134908610132  
1460.8 51.624435755132566  
1464.0 86.97938084604968  
1467.2 125.76232161628369  
1470.4 133.26035682312448  
1473.6 101.92439636732263  
1476.8 65.69750805219829  
1480.0 45.195194188020295  
1483.2 36.917501823642866  
1486.4 34.60675483134641  
1489.6 35.33064102962203  
1492.8 38.0748559885228  
1496.0 42.629345485428324  
1499.2 49.21650792703618  
1502.4 58.441894081843664  
1505.6 71.4311691284835  
1508.8 90.20222993883735  
1512.0 118.524045641464  
1515.2 164.01747498960054  
1518.4 243.84735747250696  
1521.6 400.61530191482245  
1524.8 732.5017401525982  
1528.0 1353.5521268355792  
1531.2 2074.725252621091  
1534.4 2260.0411448343225  
1537.6 1687.9644379874455  
1540.8 963.3178049308649  
1544.0 515.2643907783236

1547.2 300.2679330159558  
1550.4 195.92535529605465  
1553.6 139.57726959856018  
1556.8 106.09623609607152  
1560.0 84.86806058932198  
1563.2 70.88372241948059  
1566.4 61.55925243303828  
1569.6 55.489090453918564  
1572.8 51.908305458509446  
1576.0 50.45059454277759  
1579.2 51.0517037742497  
1582.4 53.94819973014252  
1585.6 59.776943943154066  
1588.8 69.84486129575313  
1592.0 86.78210387132306  
1595.2 116.21962840639668  
1598.4 171.49553671276664  
1601.6 286.10286136937725  
1604.8 527.9209731163962  
1608.0 928.9169157569563  
1611.2 1258.4207291808207  
1614.4 1167.5565582809263  
1617.6 766.4479828219069  
1620.8 416.06482645469316  
1624.0 228.52295391786305  
1627.2 139.95991026095743  
1630.4 94.75277324189321  
1633.6 68.87677497000364  
1636.8 52.65784721014019  
1640.0 41.781245862734124  
1643.2 34.105921984021684  
1646.4 28.471056870054753  
1649.6 24.20097065782475  
1652.8 20.879907513313444  
1656.0 18.24029375931385  
1659.2 16.103384234060933  
1662.4 14.345956225928326  
1665.6 12.880742901091676  
1668.8 11.644481465679798  
1672.0 10.590363407065706  
1675.2 9.683123974115528  
1678.4 8.895765111193427  
1681.6 8.207054829332645

1684.8 7.592314075469621  
1688.0 6.9497073626452845  
1691.2 6.0001414344498265  
1694.4 4.8100599510439235  
1697.6 4.0008280093048585  
1700.8 3.614075631797692  
1704.0 3.357587197071301  
1707.2 3.134546242173617  
1710.4 2.933247895725601  
1713.6 2.7507443366312905  
1716.8 2.5847656008660915  
1720.0 2.4333744881812747  
1723.2 2.294909676190109  
1726.4 2.1679398690213123  
1729.6 2.0512265921714383  
1732.8 1.9436938308989258  
1736.0 1.8444031062685213  
1739.2 1.7525328998589953  
1742.4 1.6673615831060071  
1745.6 1.5882531855795494  
1748.8 1.5146454741950817  
1752.0 1.4460399238934496  
1755.2 1.3819932453850747  
1758.4 1.3221101980150247  
1761.6 1.2658939068328787  
1764.8 1.2085662245121742  
1768.0 1.1014661960113852  
1771.2 0.7978760440122159  
1774.4 0.33842732415298393  
1777.6 0.06558584619188973  
1780.8 0.0051029474499016585  
1784.0 0.00014939713880236918  
1787.2 0.0  
1790.4 0.0  
1793.6 0.0  
1796.8 0.0
